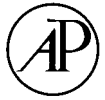

## REVIEW

## The McCree–de Wit–Penning de Vries–Thornley Respiration Paradigms: 30 Years Later

JEFFREY S. AMTHOR\*

*Environmental Sciences Division, Oak Ridge National Laboratory, Mail Stop 6422, PO Box 2008, Oak Ridge, Tennessee 37831-6422, USA*

Received: 10 November 1999 Returned for revision: 24 January 2000 Accepted: 3 April 2000

To grow, an organism must respire substrates to produce C-skeleton intermediates, usable energy (i.e. ATP), and reducing power [i.e. NAD(P)H] to support biosynthesis and related processes such as active transport of substrates. Respiration is also needed—mainly as a supplier of ATP—to maintain existing biomass in a functional state. As a result, quantifying links between respiration, growth, and maintenance are needed to assess potential plant productivity, to understand plant responses to environmental factors, and as the basis of cost-benefit analyses of alternative uses of photosynthate. Beginning 30 years ago, and continuing for about 5 years, rapid advances were made in understanding and quantifying relationships between respiration and the processes it supports. Progress has continued since then, though often as refinements rather than novel advances. The simplest framework (i.e. paradigm) for relating respiration to other processes divides respiration into growth and maintenance fractions. This often involves a combination of empiricism and mechanism. A three-component framework (growth, maintenance and wastage) has also been considered, although quantifying wastage (theoretically or empirically) remains problematic. The more general and flexible framework, called the *general paradigm* (GP, herein), relates respiration to any number of individual processes that it supports. The most important processes (from C and energy balance perspectives) identified to date that require respiration are: biosynthesis of new structural biomass, translocation of photosynthate from sources to sinks, uptake of ions from the soil solution, assimilation of N (including N<sub>2</sub>) and S into organic compounds, protein turnover, and cellular ion-gradient maintenance. In addition, some part of respiration may be associated with wastage (e.g. futile cycles and mitochondrial electron transport uncoupled from oxidative phosphorylation). Most importantly, the GP can (semi-)mechanistically relate respiration to underlying physiology and biochemistry. The GP is more complicated than other approaches to describing or modelling respiration because it is more realistic, complete and mechanistic. This review describes a history of the GP and its present state. Future research questions are suggested.

**Key words:** Review, growth, history, maintenance, model, paradigm, respiration.

## INTRODUCTION

Respiration is a complex, pivotal metabolic process in higher plants. It produces C-skeleton intermediates, usable energy (ATP), and reducing power [NAD(P)H] needed for most growth and maintenance processes. As a result, it converts a large fraction of photosynthate back to CO<sub>2</sub> (Appendix 1). Despite the importance of respiration to plant metabolism and C balance, some of its key facets are still poorly understood and quantifying relationships between photosynthesis, respiration and growth is an area of active research.

Thirty years ago (September 1969) at the International Biological Programme section of Production Processes (IBP/PP) Technical Meeting in Třeboň, Czechoslovakia, K. J. McCree (1970) presented the following empirical<sup>1</sup>

equation relating whole-plant respiration to photosynthesis and dry mass:

$$R = k_1 P + cW \quad (1)$$

where  $R$  is daily respiration [g CO<sub>2</sub> m<sup>-2</sup> (ground) d<sup>-1</sup>],  $P$  daily 'gross' photosynthesis [g CO<sub>2</sub> m<sup>-2</sup> (ground) d<sup>-1</sup>],  $W$  living dry mass [g CO<sub>2</sub> equivalents m<sup>-2</sup> (ground)],  $k_1$  a dimensionless ratio, and  $c$  a rate (d<sup>-1</sup>). The term  $k_1 P$  was later associated with 'growth respiration' and  $cW$  with 'maintenance respiration'. Equation (1), based on laboratory experiments, is noteworthy because it triggered (or catalyzed) a series of advances in a larger programme of understanding and modelling respiration, with many key advances published by 1975. The programme was driven by modellers because they needed better respiration algorithms to accurately simulate C balances. The importance of the

\* Fax 1-865-576-2779, e-mail AmthorJS@ORNL.gov

<sup>1</sup> Progress in understanding and modelling respiration can be judged in part by whether a treatment is mechanistic or empirical. *Empirical* models describe data, but do not explain it (Loomis *et al.*, 1979). Fitted lines are empirical models. Although they can be powerful, they contain no information beyond the data (Thornley and Johnson, 1990). Conversely, *mechanistic* models are reductionist and explain data

based on knowledge of processes at lower levels of biological organization. A mechanistic model of physiology is therefore generally based on biochemical principles such as enzyme kinetics and reaction stoichiometries. In turn, a mechanistic model of biochemistry is based on chemical or physical principles, and on and on 'down' levels of complexity, with the 'lowest' level *always* described empirically.

TABLE 1. Number of times key plant 'growth and maintenance respiration' publications from 1969–75 were cited in subsequent journal articles

| Original publication                  | Number of journal articles citing publication |
|---------------------------------------|-----------------------------------------------|
| McCree (1969, 1970)*                  | 258                                           |
| Thornley (1970)                       | 135                                           |
| Hesketh <i>et al.</i> (1971)          | 80                                            |
| Penning de Vries (1972)               | 131                                           |
| McCree (1974)†                        | 213                                           |
| Penning de Vries (1974)               | 63                                            |
| Penning de Vries <i>et al.</i> (1974) | 385                                           |
| Penning de Vries (1975a)              | 333                                           |
| Penning de Vries (1975b)              | 173                                           |

Citation counts are from the printed version of *Science Citation Index* for 1970–72 and from the world wide web version of *Science Citation Index Expanded*<sup>®</sup> for 1973 to February 2000. These counts include only the journals covered by *Science Citation Index*. All these articles except Hesketh *et al.* (1971) and Penning de Vries (1974) were cited in 1999.

\* These are two forms of a 'single' article, with the 1970 form usually cited.

† This paper was chosen as a *Citation Classic*<sup>®</sup> in 1985 for the Agriculture, Biology & Environmental Sciences edition of Institute for Scientific Information<sup>®</sup> *Current Contents*<sup>®</sup> (McCree, 1985).

major 1969–75 publications advancing this programme is indicated by extent of their citation in journal articles (Table 1).

This review presents a history of models of higher-plant respiration related to eqn (1), and outlines relationships between respiration and processes that it supports, such as growth and maintenance. It then briefly discusses the ratio of respiration to photosynthesis, considers effects of rising temperature and CO<sub>2</sub> concentration on respiration, and closes with questions posed to guide further research.

## RESPIRATION PARADIGMS

Three paradigms—meaning theoretical frameworks for research—are considered in this review. They are each based on relationships between respiration and different, distinguishable processes that it supports by producing C-skeleton intermediates, NAD(P)H and ATP. The two most general (i.e. at high levels of biological organization) distinguishable processes are growth of new biomass and maintenance of existing biomass. That is, there is a fundamental difference between adding to the total amount of proteins, lipids, cellulose, minerals, etc. in cells (i.e. growth) and turning over proteins and lipids or pumping mineral ions back across membranes through which they have leaked (i.e. maintenance). This difference is the basis of the first paradigm, which I call the *growth-and-maintenance-respiration paradigm* (simply GMRP hereafter). It recognizes that growth and maintenance are fundamentally different, and assumes that all metabolic processes supported by respiration can be included under either 'growth' or 'maintenance' rubrics, although growth and maintenance share some biochemical reactions. The

GMRP is usually associated with empirical studies, though it has a theoretical underpinning and can be treated (semi-)mechanistically. Equation (1) can be interpreted within the GMRP, as outlined below.

The second paradigm I call the *growth-and-maintenance-and-wastage-respiration paradigm* (simply GMWRP hereafter). It recognizes that some respiration may occur without benefit to a plant. It is a simple extension of the GMRP in which some respiration supports growth, some supports maintenance, and some may be wasted. Wasted respiration produces CO<sub>2</sub> and/or heat, but does not contribute directly to growth or maintenance. Futile cycles of ATP production and hydrolysis are supported by 'wastage respiration'. Activity of the mitochondrial alternative oxidase might also contribute to wastage. Equation (1) can be interpreted within the GMWRP if some fraction of  $k_1$  and/or  $c$  account for CO<sub>2</sub> release not contributing to growth or maintenance.

The third paradigm is more general; I call it the *general paradigm* (simply GP hereafter). The GP recognizes that individual relationships exist between respiration and each distinguishable biochemical process that it supports, including wastage. The GP represents the larger research program relating rates of respiration to rates of other processes. To use eqn (1) within the GP, relationships between photosynthesis and other processes (such as growth) must be established and both  $k_1$  and  $c$  must be decomposed to account for individual biochemical processes. Most importantly, the GP relates respiration (defined in its broadest sense of CO<sub>2</sub> or O<sub>2</sub> exchange) to underlying biochemistry and physiology and provides opportunities to do this mechanistically and quantitatively, although many aspects of biochemistry underlying respiration and processes it supports remain uncertain. This is in contrast to empirical approaches that merely describe (rather than explain) observed respiration rates. Thus, the GP (but not empirical models) can address the question 'How much growth *could* occur from a unit of photosynthesis?' from the perspective of hard science.

The title of this review is meant to suggest that all the paradigms are related and that work within all three began in earnest about 30 years ago. Indeed, the GMRP and the GMWRP are subsets of the GP.

For many reasons, photosynthesis is an important consideration for all three paradigms. In broad terms, photosynthesis supplies C substrates used in respiration, growth and maintenance, but relationships between photosynthesis and respiration can be more direct than this. For example, photosynthesis might directly supply ATP, NAD(P)H, and C-skeletons to processes 'normally' supported by respiration, obviating some respiration in photosynthesizing cells. This complicates extrapolations of night-time respiration measurements to daytime, and calculations of daytime respiratory requirements, in photosynthetic cells. It also affects interpretations of photosynthetic production as measured by daytime CO<sub>2</sub> uptake because photosynthesis may at the same time be assimilating inorganic N and S, directly supporting biosynthesis in growing photosynthetic cells (though most growth occurs

outside photosynthetically active cells), and driving phloem transport (e.g. Penning de Vries, 1975b).

## BACKGROUND AND BASIC EQUATIONS

The 1969 Třeboň meeting, and its 1970 proceedings (Šetlík, 1970), provided the first major venue for discussions of the paradigms (e.g. Beevers, 1969, 1970; de Wit and Brouwer, 1969; McCree, 1969, 1970; Canvin, 1970a,b; de Wit *et al.*, 1970; Evans, 1970; Lake and Anderson, 1970; Loomis, 1970; Monsi and Murata, 1970; Tooming, 1970). An earlier, notable interaction that contributed to the importance of the Třeboň meeting occurred among McCree, C. T. de Wit, and R. S. Loomis during spring 1968 at the University of California in Davis, USA. De Wit was trying to quantify respiration and relate it to appropriate variables in his ELEMENTARY CROp Simulator (ELCROS, a computer program) while McCree was analysing CO<sub>2</sub> exchange data for *Trifolium repens* L. obtained as follow-up to earlier work (McCree and Troughton, 1966a,b). The significance of those data for modelling respiration became obvious to the group, including the concept that respiration related to growth was ‘separate’ from respiration related to maintenance (McCree, 1985; R. S. Loomis, pers. comm., 1990). De Wit then invited McCree to present his data at Třeboň (McCree, 1985) and incorporated them into ELCROS (de Wit *et al.*, 1970). As a result, eqn (1) initiated important quantitative uses of all three paradigms, but there was an even earlier, underlying foundation.

Microbiologists concerned with production efficiency of fermentation processes were first to distinguish energy use in growth from use in maintenance, beginning with Duclaux (1898; see Pirt, 1965, and Penning de Vries, 1972). The first comprehensive discussion of the GMRP for plants (of which I am aware) was by Wohl and James (1942). Their insightful work was 30 years ahead of its time, however, with little apparent impact on respiration research, and even James (1953, p. 257) later understated their penetrating analysis. By the early 1960s it was clearer that respiration was linked causally to plant growth and that factors stimulating growth simultaneously enhanced respiration (e.g. Audus, 1960; Beevers, 1961, pp. 185–197; Gaastra, 1963). A role for respiration in maintenance was also appreciated (e.g. Olson, 1964; Yemm, 1965). This exalted respiration to a process doing more than just releasing CO<sub>2</sub> and heat—it was needed for growth and maintenance (Tanaka and Yamaguchi, 1968; Beevers, 1970)—and the GMRP was included in early C-balance models by Hiroi and Monsi (1964) and Monsi (1968). At about the same time, Warren Wilson (1967) outlined the GMWRP when he identified three components of respiration: (1) ‘maintenance respiration’, ‘to maintain existing organization, for example in the uptake of salts to replace those passively lost, and in the continuous turnover of protein’; (2) ‘constructive respiration’, to synthesize ‘new structures in growth’; and (3) ‘substrate-induced respiration’, occurring ‘when sugar levels have been raised’, and presumably unrelated to growth or maintenance. Warren Wilson then produced a hypothetical mass balance for plants indicating that maintenance plus substrate-induced

respiration was about equal in magnitude to growth respiration, but no mechanistic basis for this assertion was presented.

Other references could be cited, but this is sufficient to show that before the Třeboň meeting the GMRP, the GMWRP, and precursors of the GP existed in several forms. It could have been expected, therefore, that once a body of quantitative experimental data (from McCree, 1970, and shortly thereafter others) and mechanistic calculations (mainly from F. W. T. Penning de Vries during the early 1970s) were applied to plants within the paradigms, that uses of the paradigms would increase. This was the case, and follows directly from Yemm’s (1965) point that ‘a deeper understanding of the significance of respiration in the metabolism and energy economy of plants [would] require quantitative information, not only of the catabolic mechanisms, but also of the anabolic systems with which they may be coupled’ (italics added).

Early GMRP equations for plants were published by de Wit *et al.* (1970), McCree (1970), Thornley (1970), and Hesketh *et al.* (1971). The simplest was:

$$R = R_G + R_M = g_R G + m_R W \quad (2)$$

where  $R$  was respiration rate (e.g. mol CO<sub>2</sub> s<sup>-1</sup>),  $R_G$  was growth respiration rate (e.g. mol CO<sub>2</sub> s<sup>-1</sup>),  $R_M$  was maintenance respiration rate (e.g. mol CO<sub>2</sub> s<sup>-1</sup>),  $G$  was growth rate (e.g. g new biomass s<sup>-1</sup>),  $W$  was living biomass (e.g. g dry mass),  $g_R$  was a growth respiration coefficient (amount of CO<sub>2</sub> released *due to growth* per unit growth; e.g. mol CO<sub>2</sub> (g new biomass)<sup>-1</sup>), and  $m_R$  was a maintenance respiration coefficient (amount of CO<sub>2</sub> released *due to maintenance* per unit existing biomass per unit time; e.g. mol CO<sub>2</sub> (g living biomass)<sup>-1</sup> s<sup>-1</sup>). Growth was defined in many ways; the most useful definition was conversion of reserve materials (e.g. nonstructural carbohydrates) into new structure (i.e. structural carbohydrates, lignins, proteins, lipids, organic acids, etc.) rather than change in total dry mass (Warren Wilson, 1967; de Wit *et al.*, 1970; Penning de Vries *et al.*, 1979). That is the definition used herein. Importantly,  $g_R$  was a ratio representing the CO<sub>2</sub> by-product of growth, whereas  $m_R$  was a rate associated with maintenance activities. Both  $g_R$  and  $m_R$  can be estimated empirically by simultaneously measuring  $R$  and other variables, or calculated mechanistically from underlying process data. Both methods are used, with the mechanistic approach (based on the GP) first quantitatively articulated by Penning de Vries (1972, 1974, 1975a,b) and Penning de Vries *et al.* (1974) (see below). It should be made clear at the outset that  $g_R$  and  $m_R$  are variables, not constants.

The GMRP also formed the basis of a simple whole-plant growth equation (Thornley, 1970):

$$G = Y_G(P - R_M) = Y_G P - Y_G m_R W \quad (3)$$

where  $Y_G$  was the yield of growth processes (i.e. amount of growth per unit substrate used *in growth processes*, including that part of substrate retained in new structure) and photosynthesis ( $P$ ) had the same units as  $R$ . With consistent units,  $Y_G = 1/(1 + g_R)$ . Equation (3) applies to



whole plants in a *steady state* of substrate production in photosynthesis and use in growth and respiration. In that steady state,  $G = P - R$  and McCree's (1970)  $k_1 = 1 - Y_G$  and  $c = Y_G m_R$  (Thornley, 1970). Equation (3) can be applied to an individual organ/tissue if  $P$  is replaced with the rate of substrate import and no net change in reserve material amount occurs in that organ/tissue. Monsi's (1968) earlier model contained forms of eqns (2) and (3), but it apparently played only a minor role in GMRP advances.

The issue of priorities for photosynthate use is sometimes raised. For example, is a fixed rate of maintenance respiration required, with growth then supported by the substrate 'left over'? Equation (2) does not specify priorities; it simply states that both  $R_G$  and  $R_M$  contribute to respiration in growing plants. On the other hand, some rate of maintenance is continuously needed in living cells and maintenance therefore probably entails some minimal priority for substrate use, but because  $m_R$  and  $g_R$  (and  $Y_G$ ) are variables with respect to time and environmental conditions, apparent priorities may also vary. Plants dynamically balance substrate use between maintenance and growth activities depending on environmental conditions, physiological state, and developmental state. Implications of substrate-use priorities for maintenance *vs.* growth within the context of mathematical models were recently assessed by Thornley and Cannell (2000).

Thornley (1971) extended the GMRP by formalizing the GMWRP shortly after the Tréboň meeting [compare this to 'substrate-induced respiration' of Warren Wilson (1967) and 'idling respiration' of Beevers (1970)]. De Wit *et al.* (1970) thought it difficult to separate idling from maintenance. Thornley (1971) noted that wastage respiration could increase apparent  $g_R$  and/or  $m_R$ , depending on its biochemical nature. If mechanistic calculations determine what  $g_R$  and  $m_R$  'should' be, these values could be compared to measurements of those coefficients [e.g. based on eqn (2)] to estimate the degree of wastage. To the extent that some respiration is 'wasted', the GMRP is incomplete.

An important point is that maximum productivity from a unit of photosynthate would be achieved if ATP and NAD(P)H produced by respiration were used only in reactions 'directly contributing to growth and maintenance' (Beevers, 1970). A related point is that the ratio of ATP production (from ADP and  $P_i$ ) to  $CO_2$  release in respiration should be related to productivity per unit photosynthesis. Herein, the ratio ATP produced per  $CO_2$  released in the biochemical pathways of respiration is symbolized  $Y_{ATP,C}$  [mol ATP (mol  $CO_2$ )<sup>-1</sup>]. Note that  $Y_{ATP,C}$  is a complicated variable, not a constant. The importance of  $Y_{ATP,C}$ , and being able to estimate it mechanistically (Appendix 2), arises from the points that most maintenance respiration probably involves ATP production and a considerable fraction of  $g_R$  is related to ATP production. Indeed,  $m_R$  is inversely related to  $Y_{ATP,C}$ , so an understanding of maintenance respiration rate relies directly on an understanding of  $Y_{ATP,C}$ . One aspect of respiratory efficiency (i.e.  $Y_{ATP,C}$ ) that receives considerable attention is engagement of the alternative oxidase (e.g. Lambers, 1979; Millar *et al.*, 1998) which reduces the number of protons pumped across the inner mitochondrial membrane per NAD(P)H oxidized

there. This in turn reduces  $Y_{ATP,C}$ , as quantitatively accounted for in Appendix 2.

The maximum value of  $Y_{ATP,C}$  may be a little less than 5 (Appendix 2), whereas most previous mechanistic studies assumed that  $Y_{ATP,C}$  was as large as 6 to 6.3 (e.g. Penning de Vries *et al.*, 1974; Penning de Vries, 1975a; McDermitt and Loomis, 1981; Williams *et al.*, 1987; Thornley and Johnson, 1990). Thus, modest amendments to many previous theoretical estimates of  $m_R$  and  $g_R$  (and other 'respiratory coefficients') are needed.

## MAINTENANCE AND MAINTENANCE RESPIRATION

Defining maintenance is tricky, but the definition by Penning de Vries (1975a) remains useful: maintenance includes processes that maintain cellular structures and intracellular gradients of ions and metabolites, along with cellular acclimation (phenotypic adjustment) to environmental changes. Replacement of one set of enzymes with another during ontogeny may also be considered maintenance. Dominant maintenance processes are macromolecular turnover (i.e. simultaneous breakdown and 're'-synthesis) and active transport that offsets membrane leaks. The 'purpose' is to maintain cellular functionality. 'Maintenance respiration' is  $CO_2$  release resulting from maintenance activities. Maintenance processes may consume mainly ATP rather than C-skeletons or NAD(P)H.

As outlined by Wohl and James (1942), maintenance respiration rate  $R_M$  can be calculated from rates of underlying processes if the metabolic costs and stoichiometries of  $CO_2$  release of those processes are known. The questions then become, what are the rates of maintenance processes and what are their metabolic costs in  $CO_2$  units? Answering these questions is a mechanistic approach to evaluating the maintenance respiration coefficient  $m_R$ . Penning de Vries (1975a) made the first comprehensive attempt to do this, considering mainly turnover and intracellular transport processes.

The coefficient  $m_R$  is decomposed to explicitly account for different maintenance processes with:

$$m_R = \sum_{\text{processes}, X} m_{R,X} = \sum_{\text{processes}, X} c_X a_X \quad (4)$$

where  $X$  is a maintenance process,  $m_{R,X}$  is the maintenance respiration coefficient for process  $X$ ,  $c_X$  is cost of process  $X$  (in  $CO_2$  per unit activity of  $X$ ), and  $a_X$  is rate of process  $X$  per unit biomass (i.e. specific activity). Three processes—protein turnover, lipid turnover and active intracellular ion transport—are considered below. Equation (4) is 'complete' when all quantitatively important processes are included. But, until better estimates of *in situ* costs and activities of maintenance processes are obtained, mechanistic estimates of  $m_R$  will remain crude.

### Turnover of cellular components

Most protein breakdown is catalyzed by proteases under metabolic regulation. Protein turnover allows cells to alter their enzyme makeup in response to ontogeny and/or

environmental changes, and it facilitates removal/replacement of abnormal or damaged proteins (Vierstra, 1993). Without turnover, protein requirements would be greatly increased because plants would need the full complement of proteins required to function across a range of environmental conditions and all stages of development. Rapid response (including acclimation) to environmental change or stress may require rapid turnover, though evidence that background turnover rate must be rapid is lacking.

ATP required per amino acid for protein turnover is estimated in Table 2; conversion to protein turnover cost  $c_{pt}$  in CO<sub>2</sub> per amino acid depends on the ratio of CO<sub>2</sub> release per ATP formed, or  $1/Y_{ATP,C}$ . The minimum (i.e. most efficient) value of  $1/Y_{ATP,C}$  is about 0.2 CO<sub>2</sub>/ATP (Appendix 2). This gives  $c_{pt} \approx 0.9\text{--}1.6$  CO<sub>2</sub>/amino acid for the case of complete amino acid recycling and with an ATP cost of 4.7–7.9 per amino acid (see Table 2);  $c_{pt}$  is larger with amino acid turnover [Table 2, note (b)]. Note that  $c_{pt}$  includes mRNA turnover cost (Table 2). Turnover of other RNAs is probably an even smaller fraction of  $c_{pt}$ .

Protein turnover rates may vary significantly among species, organs and environments, as well as temporally. For example, Zerihun *et al.* (1998) summarized literature indicating that between 6.5 and 21 % of total protein turns over daily, though data from plants in the field are limited. As a hypothetical example, biomass with 10 % protein turning over with a rate of 0.15 d<sup>-1</sup> [i.e.  $a_{pt} = 0.1$  kg protein (kg biomass)<sup>-1</sup> × 0.15 d<sup>-1</sup> = 0.015 kg protein (kg biomass)<sup>-1</sup> d<sup>-1</sup>] would cycle amino acids through protein at a rate of 130 mmol (kg biomass)<sup>-1</sup> d<sup>-1</sup> (for 0.119 kg mol<sup>-1</sup> mean molecular mass of amino acids, i.e.  $a_{pt}/0.119$ ). [Hereafter, (kg biomass)<sup>-1</sup> is written kg<sup>-1</sup>.] This gives 120–210 mmol CO<sub>2</sub> kg<sup>-1</sup> d<sup>-1</sup> as the maintenance coefficient for protein turnover  $m_{R,pt}$  with  $c_{pt}$  as above. Bouma *et al.* (1994) estimated experimentally that 17–21 % of darkened, detached mature-leaf respiration was associated with protein turnover (equivalent to  $m_{R,pt} \approx 200$  mmol CO<sub>2</sub> kg<sup>-1</sup> d<sup>-1</sup>).

Membranes (including their proteins) also turn over. The plasmalemma of some cells may turn over every few hours, though no metabolic cost of this rapid process was estimated (Steer, 1988). If lipids are catabolized during membrane turnover, biosynthesis of new lipids is required. The maintenance coefficient for membrane lipid turnover (i.e.  $m_{R,lt} = c_{lt}a_{lt}$ ) can hardly be evaluated from available data: Penning de Vries (1975a) speculated that membrane turnover might have a respiratory cost of 60 mmol CO<sub>2</sub> kg<sup>-1</sup> d<sup>-1</sup>, whereas calculations in Thornley and Johnson (1990, pp. 365–366) lead to a respiratory cost of lipid turnover of 8 mmol CO<sub>2</sub> kg<sup>-1</sup> d<sup>-1</sup> (for  $1/Y_{ATP,C} = 0.2$  CO<sub>2</sub>/ATP).

Turnover of other macromolecules (e.g. DNAs, chlorophylls, hormones) was estimated to be unimportant to  $m_R$  (Penning de Vries, 1975a). Nonetheless, rates and pathways (i.e. costs) of turnover are largely unknown for most macromolecules (see e.g. Matile *et al.*, 1999, for chlorophyll).

TABLE 2. Estimated specific costs of component processes of protein turnover

| Process                                           | Metabolic cost (ATP per amino acid) <sup>a</sup> |
|---------------------------------------------------|--------------------------------------------------|
| Protein breakdown (to amino acids)                | 0.13–2                                           |
| Protein synthesis (from amino acids) <sup>b</sup> |                                                  |
| Amino acid activation                             | 2 <sup>c</sup>                                   |
| Editing for misaminoacylation of tRNAs            | 0–0.15                                           |
| Polypeptide initiation and elongation             | 2 + 1/ $n^d$                                     |
| Editing noncognate aminoacyl-tRNA                 | 0–0.01                                           |
| Methylation, acetylation, glycosylation, etc.     | 0–1 <sup>e</sup>                                 |
| Phosphorylation                                   | 0.1–0.3 <sup>e</sup>                             |
| mRNA turnover <sup>f</sup>                        | 0.16–0.36                                        |
| Signal sequences                                  | 0.18–1.0                                         |
| Total synthesis                                   | 4.5–5.9 <sup>g</sup>                             |
| Total (breakdown + synthesis)                     | 4.7–7.9                                          |

Based on Zerihun *et al.* (1998); some values are speculative.

<sup>a</sup> Cost is expressed as ATP cleavage to ADP and P<sub>i</sub>.

<sup>b</sup> Some amino acids produced by protein breakdown are recycled (i.e. repolymerized in subsequent protein synthesis) and some are catabolized. Synthesis of amino acids to replace those catabolized increases the cost of protein turnover (not shown); according to Zerihun *et al.* (1998), resynthesizing all the amino acids would increase total protein turnover cost by more than 83 % (see also Penning de Vries, 1975a; de Visser *et al.*, 1992).

<sup>c</sup> One ATP is cleaved to AMP and PP<sub>i</sub> per amino acid. This is equated with 2 ATP through the action of adenylate kinase (i.e. ATP + AMP → 2 ADP). Note that PP<sub>i</sub> might serve as an energy source in other maintenance processes (e.g. active transport through tonoplasts).

<sup>d</sup>  $n$  is number of amino acid residues in a protein.

<sup>e</sup> From de Visser *et al.* (1992).

<sup>f</sup> mRNA turnover accounts for mRNA ‘lifetime’, i.e. number of protein molecules polymerized before an mRNA molecule is broken down.

<sup>g</sup> Assumes  $n$  is large (i.e. cost of polypeptide initiation and elongation is 2 ATP/peptide).

### Intracellular ion-gradient maintenance

Active ion transport to counteract membrane leaks (or regulate pH or osmotic potential) is part of maintenance; the ‘original’ ion compartmentation is part of growth. To evaluate active ion transport cost ( $c_{ion}$ , CO<sub>2</sub>/ion), CO<sub>2</sub> release must be related stoichiometrically to the transport energy source. That source can be ATP, but also PP<sub>i</sub> at tonoplasts and perhaps NAD(P)H at plasmalemmas (Marschner, 1995, pp. 21–25). Using ATP, with H<sup>+</sup>:ATP = 1:1 and ion:H<sup>+</sup> = 1:1,  $c_{ion}$  is  $1/Y_{ATP,C}$ . [Different values for  $c_{ion}$  may arise for PP<sub>i</sub> or NAD(P)H use with the same ion:H<sup>+</sup>.] Based on ion flux data from artificial conditions, Penning de Vries (1975a) gave 2 mol ion kg<sup>-1</sup> d<sup>-1</sup> as an order of magnitude of specific active transport  $a_{ion}$ . With  $c_{ion} = 0.2$  CO<sub>2</sub>/ion (from maximum  $Y_{ATP,C}$ ), the intracellular ion-gradient maintenance coefficient  $m_{R,ion}$  ( $=c_{ion}a_{ion}$ ) would be 400 mmol CO<sub>2</sub> kg<sup>-1</sup> d<sup>-1</sup>.

The possibly large contribution of ion-gradient maintenance to  $R_M$  does not fit well into the ‘recycling’ model of growth and maintenance respiration proposed by Thornley (1977). In that model, ‘degradable’ biomass is broken down over time and added to the pool of substrate (also supplied

by photosynthesis) used for biosynthesis and respiration (and see [Thornley and Johnson, 1990](#); [Thornley and Cannell, 2000](#)). Substrate is simultaneously converted to biomass with efficiency  $Y_G$ , with  $(1 - Y_G)$  of the substrate oxidized to  $\text{CO}_2$ . The fraction of  $\text{CO}_2$  release associated with resynthesis of degraded biomass is called maintenance, but a difficulty arises because leaking ions may not contribute to the substrate pool nor does ion-gradient maintenance occur with efficiency  $Y_G$ . Although the recycling model is well posed to address the macromolecule-turnover component of maintenance, it is an incomplete model of respiration because it lacks ion-gradient maintenance.

The enclosed, multicellular nature of higher plants, along with the presence of much of their body in air, greatly limits ion leakage to the environment. (Roots grown hydroponically can be an important exception.) In contrast, bacteria in chemostats—which formed the basis of much early work on growth and maintenance principles—experience large ion gradients, with rapid leakage and consequently greater maintenance needs. This is seen in large values of bacterial  $m_R$  (typically ten–100 times plant values) determined in the laboratory. In soils, however, bacterial  $m_R$  is greatly reduced (as inferred from soil respiration rate).

#### Measuring $m_R$

In addition to calculating  $m_R$  (or its components) from costs and rates of underlying processes with eqn (4), it can be estimated by measuring respiration rate  $R$ . For example, eqns (1), (2), or (3) can be solved experimentally. When this is done for crop species at moderate temperatures,  $m_R$  falls in the range 110–4600  $\text{mmol CO}_2 \text{ kg}^{-1} \text{ d}^{-1}$ , with root values often exceeding shoot/leaf/fruit values ([Amthor, 1989](#), pp. 78–79). Caution is needed when using individual results because several factors can compromise accuracy ([Amthor, 1989](#)).

Measuring  $R/W$  during extended dark periods was proposed by [Penning de Vries \(1972\)](#) and [McCree \(1974\)](#) as another method of estimating  $m_R$ . McCree wrote: ‘when a plant is placed in darkness, it uses up its reserves . . . and growth eventually stops. At this point, the efflux of  $\text{CO}_2$  is entirely due to maintenance’. Because of its simplicity, this method was often used, but it may be unreliable. During extended dark periods, physiological functionality can decline (e.g. [Challa, 1976](#); [Breeze and Elston, 1983](#)) and growth may continue (e.g. [Robson and Parsons, 1981](#); [Moser et al., 1982](#); [Denison and Nobel, 1988](#)), invalidating the assumption that respiration then reflects normal maintenance costs. Thus, this ‘starvation method’ of estimating  $m_R$  fell out of favour ([McCree, 1986](#)).

Another method of evaluating  $m_R$  is to measure  $R/W$  in ‘mature’ tissues/organs. The assumption is that mature organs do not grow so  $R_G = 0$  and  $R_M = R$ . A complication is that even in mature organs non-maintenance processes may occur. For leaves—a favourite organ of study—the clearest difficulty concerns respiration supporting translocation ([de Wit and Brouwer, 1969](#); [Irving and Silsbury, 1988](#)). Also, respiration supporting senescence and mobilization (including translocation) can be important in

old leaves ([de Wit and Brouwer, 1969](#)). This ‘mature-tissue method’ is nonetheless popular for estimating leaf  $m_R$  (e.g. [Ryan, 1995](#)). Its appeal is that it does not involve special treatments or experimental conditions, simply intact-organ respiration measurements. It is used in winter to estimate tree-stem  $m_R$  based on the assumption that wood growth is halted then (e.g. [Ryan, 1990](#); [Sprugel, 1990](#); [Ryan et al., 1995](#); [Edwards and Hanson, 1996](#); [Lavigne et al., 1996](#); [Lavigne and Ryan, 1997](#); [Maier et al., 1998](#); [Stockfors and Linder, 1998](#)). To apply these winter estimates of tree-stem  $m_R$  to other seasons, a temperature response function is used to account for seasonal (and diurnal) temperature changes. Mean annual tree-stem  $m_R$  in eight boreal forests estimated in this way ranged from 1.9 to 9.7  $\text{mmol CO}_2 (\text{kg sapwood})^{-1} \text{ d}^{-1}$  ([Lavigne and Ryan, 1997](#)), or one to three orders of magnitude smaller than crop-plant  $m_R$  values estimated with eqns (1), (2), or (3) (see above). (Heartwood is metabolically inactive.) Potential acclimation of sapwood maintenance processes to seasonal temperature patterns is a possible, but poorly understood, weakness in this application of the mature-tissue method. Moreover, it has not been established whether winter maintenance processes are well related to summer maintenance processes in sapwood.

#### General principles related to $m_R$

Two common generalizations about  $m_R$ —both first spelled out by [de Wit et al. \(1970\)](#)—are that it responds strongly to temperature and is positively related to plant N content ( $N$ ; e.g.  $\text{kg N}$ ). For short-term (hours to days) changes in temperature, the  $Q_{10}$  of  $m_R$  is typically about 2 (e.g. [McCree, 1974](#); [Penning de Vries, 1975a](#); [Jones et al., 1978](#); [McCree and Silsbury, 1978](#); [McCree and Amthor, 1982](#); [Marcelis and Baan Hofman-Eijer, 1995](#)). It is possible that long-term (days to years) temperature changes lead to adaptation (genotypic adjustment) and/or acclimation of maintenance processes, but only a few data address this possibility. Whole-plant  $m_R$  of the perennial herb *Reynoutria japonica* was adapted to temperature at different altitudes (700 vs. 2420 m) ([Mariko and Koizumi, 1993](#)). Similarly, leaf  $m_R$  was greater at a given temperature for boreal and subalpine trees and shrubs compared with typical values from temperate-area plants ([Ryan, 1995](#)). Conversely, neither *R. japonica* whole-plant  $m_R$  ([Mariko and Koizumi, 1993](#)) nor *Cucumis sativus* L. fruit  $m_R$  ([Marcelis and Baan Hofman-Eijer, 1995](#)) acclimated to temperature changes imposed artificially for several weeks.

With respect to  $N$ ,  $m_R$  can be better related to it than to  $W$  (or plant area or volume) in some cases (e.g. [Penning de Vries, 1972, 1975a](#); [McCree, 1974, 1983](#); [Jones et al., 1978](#); [Ryan, 1991](#); [Li and Jones, 1992](#); [Ryan, 1995](#); [Maier et al., 1998](#)) but not others ([Byrd et al., 1992](#); [Ryan, 1995](#); [Lavigne et al., 1996](#); [Lavigne and Ryan, 1997](#)). To emphasize an  $R_M$ – $N$  link, eqn (2) is sometimes rewritten as:

$$R = g_R G + m_{R,N} N \quad (5)$$



where  $m_{R,N}$  is a maintenance coefficient in terms of  $N$  (i.e. with units  $R/N$ , such as  $\text{mol CO}_2 (\text{kg N})^{-1} \text{s}^{-1}$ ), and  $R_M = m_{R,N}N$  (de Wit *et al.*, 1970; Barnes and Hole, 1978), but more work is needed to quantify how, when and where  $m_R$  is related to  $N$ .

In addition to links to short-term temperature patterns, and often to  $N$ ,  $m_R$  can be positively related to overall metabolic rate, assessed as net  $\text{CO}_2$  assimilation (Penning de Vries, 1974, 1975a; McCree, 1982; Amthor, 1989; Lavigne and Ryan, 1997). This property of  $m_R$  was included in models as a separate component of  $R_M$  (along with protein-turnover and ion-gradient-maintenance components) by Penning de Vries and van Laar (1977), de Wit *et al.* (1978), and Penning de Vries *et al.* (1989). From a mechanistic perspective, this characteristic of  $m_R$  may reflect increased macromolecular turnover and ion leakage with increased metabolic rate, rather than an additional component of maintenance. It might also reflect increased wastage respiration. To understand, and quantify, this aspect of respiration, better data on turnover and ion leakage rates as functions of overall metabolic activity are needed.

Maintenance processes are usually slow in developing storage organs such as tubers and seeds (Penning de Vries *et al.*, 1983; Ploschuk and Hall, 1997). This is expected because proteins in those organs are mostly inactive storage molecules (i.e. slow turnover). Also,  $a_{\text{ion}}$  is probably slow there because of the chemical and physical properties of those cells. Whole-plant  $m_R$  (or  $m_{R,N}$ ) may therefore decline during grain or tuber filling because of small  $m_R$  (or  $m_{R,N}$ ) in developing storage organs. This has consequences for crop productivity and relationships between plant mass or  $N$  content and respiration during grain (McCree, 1988; Stahl and McCree, 1988) and tuber filling.

If substrate availability limits growth, and maintenance ‘competes’ with growth for substrate, a reduction in  $m_R$  will enhance growth, providing the reduction occurs without drawbacks (McCree, 1974; Robson and Parsons, 1981; e.g. if some part of maintenance is unnecessary or  $R_M$  includes wastage, in which case the GMWRP is more appropriate than the GMRP). For example, perhaps some protein turnover is superfluous in crops and could be eliminated (Penning de Vries, 1974). One promising (at least for a time) example of yield enhancement through  $m_R$  reduction was the negative correlation between growth and mature-leaf respiration rate in *Lolium perenne* L. genotypes (Wilson, 1975). Wilson noted that such respiration presumably reflected ‘maintenance respiration, with a small proportion for growth-supporting processes such as translocation’. Many studies of those genotypes followed, with Kraus *et al.* (1993) eventually finding that the  $m_R$ -growth relationship held only with high plant density. They concluded that respiration could not ‘be regarded as the primary factor determining differences in yield’. Still, some crop improvement might result (or have resulted) from inadvertent selection for reduced  $m_R$  and/or wastage (McCullough and Hunt, 1989; Earl and Tollenaar, 1998).

## GROWTH RESPIRATION

In principle, calculating  $\text{CO}_2$  released (i.e.  $g_R$ ) and substrate consumed (i.e.  $1/Y_G$ ) during unit growth is straightforward. It is done by summing all biochemical reactions of growth (weighted for biomass composition) and balancing net ATP and NAD(P)H requirements with an amount of respiration producing that ATP and NAD(P)H (Penning de Vries *et al.*, 1974). This ‘pathway analysis method’ of calculating  $g_R$  (and  $Y_G$ ) requires knowledge of (1) *substrates* (e.g. specific sugars and amides) used in growth, (2) *pathways* of biosynthesis and respiration used in growth, and (3) *composition* of biomass produced in growth. Both  $g_R$  and  $Y_G$  are temperature independent to the extent that substrates, pathways and biomass composition are temperature independent. Because the method does not predict growth rate  $G$ , separate knowledge of  $G$  is needed to calculate growth respiration rate  $R_G (=g_R G)$ . Obviously, rapid  $G$  causes rapid  $R_G$ .

The method originated, for plants, with Loomis’s comment to de Wit in 1968 that by tracing biochemical pathways on a Gilson Medical Electronics (Madison, WI, USA) chart of interconnected reactions, the amount of biomass end product and  $\text{CO}_2$  by-product obtained from unit substrate could be calculated. Loomis also commented, however, that ‘it is too big a job’ (R. S. Loomis, pers. comm., 1999). After early calculations by Penning de Vries in 1969, C. Veeger (Agricultural University, Wageningen, The Netherlands) was consulted about prospects for the method; he also thought it was too ambitious, whereas A. H. Stouthamer (Free University, Amsterdam) encouraged it (F. W. T. Penning de Vries, pers. comm., 1999), and the analysis proceeded as described in Penning de Vries *et al.* (1974). [The method was applied early on to bacteria by Gunsalus and Shuster (1961)—although they ignored several subprocesses of growth—by Forrest and Walker (1971), and by Stouthamer (1973).] De Wit *et al.* (1970) summarized early calculations at Třeboň. The goal was to determine maximum *potential* efficiency of growth.<sup>2</sup> Later, it was concluded from experiments that actual efficiency in plants approaches the potential, at least under favourable conditions [except perhaps in roots (Lambers, 1979)], meaning that  $Y_G$  for a given biomass composition cannot be much improved through breeding or biotechnology (Penning de Vries, 1974; Penning de Vries and van Laar, 1977; Penning de Vries *et al.*, 1983). Though this conclusion may be true, I believe it deserves further consideration because of its potential importance in improving crop yield and understanding ecosystem primary productivity.

The key aspect of the method is its calculation of  $g_R$  and  $Y_G$  from underlying biochemistry. As such, it explains growth costs and is central to the GP. A limitation is the difficulty of obtaining accurate, complete biomass composition data. Moreover, pathway knowledge is sometimes incomplete, especially for secondary compounds. In

<sup>2</sup> Based on an apparent early attempt to calculate potential efficiency, de Wit mentioned ‘respiration associated with possible growth’ in ELCROS code internally dated 16 May 1968 along with a growth respiration factor of 0.404 of substrate available for growth (from files of R. S. Loomis).

particular, Penning de Vries *et al.* (1974) were forced to estimate the pathway of lignin synthesis because complete descriptions were unavailable. Also, synthesis of hemicelluloses and some other biomass components were ‘greatly simplified’ in their analysis. Knowledge of biosynthetic pathways has progressed since then and the method has been applied to a broader range of biomass components (e.g. Chung and Barnes, 1977; Merino *et al.*, 1984; Williams *et al.*, 1987; Gershenzon, 1994), though questions remain about some pathways.

#### Growth subprocesses

In developing the pathway analysis method, Penning de Vries *et al.* (1974) identified five subprocesses of growth that consume energy and/or C-skeletons: (1)  $\text{NO}_3^-$  and  $\text{SO}_4^{2-}$  reduction; (2) active uptake of minerals and organic substrates into growing cells; (3) monomer synthesis from those substrates; (4) polymerization; and (5) tool maintenance. Additionally, (6) active mineral uptake by roots and (7) phloem loading in source organs support growth and use energy.

The chemical reduction of any  $\text{NO}_3^-$  and  $\text{SO}_4^{2-}$  taken up from the soil requires reducing agents. These are formed in respiration (and/or photosynthesis in photosynthetically active cells). Active uptake of minerals and substrates into growing cells presumably requires ATP, and that ATP is derived mainly from respiration. Monomer synthesis is an especially important part of growth and is outlined in more detail below. Polymerization of some monomers requires energy in the form of ATP or reducing agents. Those can be derived from respiration (and/or photosynthesis). For example, the outline of ATP requirements for amino acid polymerization given in Table 2 applies to growth as well as maintenance. ‘Tool maintenance’ is turnover of RNA and enzymes catalyzing growth. It is distinguished from maintenance outlined above, which was called ‘structure maintenance’ (Penning de Vries *et al.*, 1974), because it is growth-rate dependent. Its costs, which are probably a small fraction of total growth costs, are calculated as outlined in Table 2. The ATP requirements can be met by respiration. Active mineral uptake by roots requires energy (e.g. ATP), which is produced by respiration. Phloem loading in source organs also requires energy in the form of ATP, which is produced by respiration (and/or photosynthesis during the day).

Monomer synthesis is central to growth because it is the main use of substrates during growth and because it accounts for the conservation of C within new biomass. Phenylalanine is used to illustrate the monomer synthesis part of the method. Phenylalanine synthesis from glucose and  $\text{NH}_3$  is divided into three stages herein (other substrates could be used, but the procedure is the same). First, phosphoenolpyruvate (PEP) is produced via glycolysis in nine reactions, summarized by:

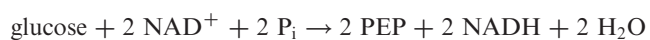

Second, erythrose 4-P (E4P) is formed by cycling glucose 6-P through the oxidative pentose phosphate network (OPPN) in nine reactions, summarized by:

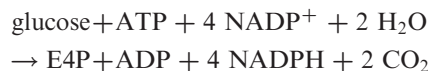

Third, the shikimate pathway (in plastids) combines PEP, E4P and  $\text{NH}_3$  to form phenylalanine in 12 reactions, summarized by:

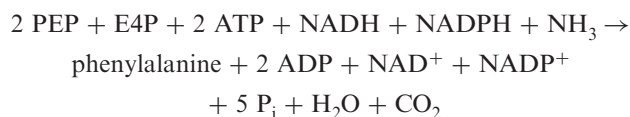

The overall summary is:

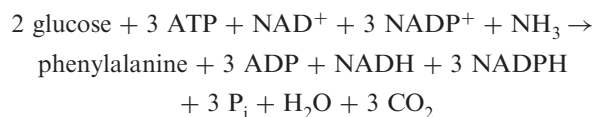

Nine of 12 C in glucose are retained in phenylalanine. Only two of the three  $\text{CO}_2$  released per phenylalanine are from respiratory reactions (in the OPPN), but all three are part of ‘growth respiration’. The three ATP required could come from additional glucose catabolism, but could also be produced during mitochondrial oxidation of the NADH and NADPH formed as co-products (assuming they have access to mitochondria). Indeed, up to six ATP *might* be formed from the four NAD(P)H [i.e. 1.5 ATP/NAD(P)H, see Appendix 2], giving a three ATP ‘excess’. That excess is available to other processes *at the same time and place*, but would be insufficient to add the phenylalanine to an elongating polypeptide (Table 2). (In addition to protein, phenylalanine is also a precursor of other important macromolecules such as lignins and flavonoids.) This outline of phenylalanine biosynthesis differs slightly from summaries in Penning de Vries *et al.* (1974) and Thornley and Johnson (1990). In fact, for most compounds I calculate slightly different pathway stoichiometries, based on newer biochemical knowledge. Moreover, most previous analyses assumed that  $Y_{\text{ATP,C}}$  was larger than is now thought (see above). Overall effects on  $g_R$  and  $Y_G$  are undetermined, but probably minor. Nonetheless, pathway analyses should be updated as biochemical knowledge advances.

Penning de Vries *et al.* (1974) simplified this method of calculating growth costs by categorizing compounds (they considered 61) into five groups: nitrogenous compounds (mainly amino acids and proteins), carbohydrates (mainly structural), lipids, lignin, and organic acids. Differences in biosynthetic costs between compounds within groups were small, but differences between groups were large. Minerals formed a sixth group, which incurred transport costs only during growth. This simplification allowed application of the method to proximate biomass composition (i.e. fraction of biomass composed of carbohydrates, proteins, lipids, lignins, organic acids and minerals) rather than requiring more detailed, and difficult to obtain, composition data.



## Local growth respiration

In eqn (2)—or any related GMRP equation— $g_R$  is the amount of  $\text{CO}_2$  released per unit of growth. For whole plants, all seven growth subprocesses are included in  $g_R$ , and thus  $R_G$ . For individual organs, however,  $g_R$  includes only active import, monomer synthesis from imported substances such as sucrose and amides, polymerization, and tool maintenance. It is therefore useful to consider a  $g_R$  describing growth respiration within growing organs, written  $g_{R,\text{local}}$ , where ‘local’ means ‘in the growing organ’ (see Cannell and Thornley, 2000; Thornley and Cannell, 2000). Growth-related processes excluded from  $g_{R,\text{local}}$ , such as  $\text{NO}_3^-$  assimilation, ion uptake from the soil, and phloem loading, can perhaps best be treated as separate respiratory components (Johnson, 1990; Amthor, 1994a; Cannell and Thornley, 2000; and see below).

A  $g_{R,\text{local}}$  was the basis of the analysis of crop storage-organ growth costs by Penning de Vries *et al.* (1983). That analysis, the results of which are summarized in Table 3, encompassed a wide range of tissue composition and illustrated several important points. (1) Calculated values of  $g_{R,\text{local}}$  across the organs were in the range 0.13 to

0.43 mol  $\text{CO}_2$  (mol C added to structure) $^{-1}$ , corresponding to  $Y_{G,\text{local}}$  values of 0.89 to 0.70 mol C (mol C) $^{-1}$ . That is, between 70 and 89 % of the C in imported substrate was retained in the products of growth. (2) Calculated values of  $g_{R,\text{local}}$  were strongly, positively related to C content ( $Y_{G,\text{local}}$  was strongly, negatively related to C content). And (3)  $g_{R,\text{local}}$  was smallest in high-carbohydrate tubers/beets, intermediate in low-lipid shoot organs, and largest in lipid-rich organs.

## Mass vs. energy

In terms of mass (dry) of product synthesized per unit mass (dry) of substrate used, lipids are ‘expensive’ whereas structural carbohydrates are ‘cheap’ (e.g. Table 10 in Penning de Vries *et al.*, 1989), but in terms of energy in products per energy in substrate, there is less difference among compounds (e.g. McDermitt and Loomis, 1981). And because biomass C content is positively related to energy content (through reduction state), biomass C content is inversely related to mass-based  $Y_G$ .

In some ecological contexts, a  $Y_G$  based on energy (e.g.  $Y_{G,E}$ ,  $\text{J J}^{-1}$ ; and see Thornley, 1971) can be more

TABLE 3. Local growth respiration coefficient  $g_{R,\text{local}}$  and corresponding true growth yield  $Y_{G,\text{local}}$  [ $Y_G = 1/(1 + g_R)$ ] for crop-plant storage organs estimated from biochemical pathway analysis (derived from Penning de Vries *et al.*, 1983, Table 4)

| Crop, organ                          | Composition (%: carbohydrate, protein, lipid, lignin, organic acid, mineral, C) | $g_{R,\text{local}}$ [mol $\text{CO}_2$ released (mol C added to structure) $^{-1}$ ] | $Y_{G,\text{local}}$ [mol C added to structure (mol C in substrate used) $^{-1}$ ] |
|--------------------------------------|---------------------------------------------------------------------------------|---------------------------------------------------------------------------------------|------------------------------------------------------------------------------------|
| <b>Tubers and beets</b>              |                                                                                 |                                                                                       |                                                                                    |
| Cassava, tuber                       | 87, 3, 1, 3, 3, 3, 45                                                           | 0.13                                                                                  | 0.89                                                                               |
| Sugarbeet, beet                      | 82, 5, 0, 5, 4, 4, 45                                                           | 0.13                                                                                  | 0.89                                                                               |
| Potato, tuber                        | 78, 9, 0, 3, 5, 5, 44                                                           | 0.13                                                                                  | 0.88                                                                               |
| Yam, tuber                           | 80, 6, 1, 3, 5, 5, 44                                                           | 0.13                                                                                  | 0.88                                                                               |
| Sweet potato, tuber                  | 84, 5, 2, 3, 3, 3, 45                                                           | 0.14                                                                                  | 0.88                                                                               |
| <b>Low-lipid shoot organs</b>        |                                                                                 |                                                                                       |                                                                                    |
| Wheat, inflorescence + grain         | 76, 12, 2, 6, 2, 2, 47                                                          | 0.16                                                                                  | 0.86                                                                               |
| Rice, inflorescence + grain          | 76, 8, 2, 12, 1, 1, 49                                                          | 0.17                                                                                  | 0.86                                                                               |
| Grain sorghum, inflorescence + grain | 72, 9, 3, 12, 2, 2, 49                                                          | 0.18                                                                                  | 0.85                                                                               |
| Maize, cob + grain                   | 75, 8, 4, 11, 1, 1, 48                                                          | 0.18                                                                                  | 0.85                                                                               |
| Millet, inflorescence + grain        | 69, 9, 4, 12, 3, 3, 48                                                          | 0.18                                                                                  | 0.84                                                                               |
| Cowpea, pod + seed                   | 61, 22, 2, 7, 4, 4, 47                                                          | 0.19                                                                                  | 0.84                                                                               |
| Field bean, pod + seed               | 60, 23, 2, 7, 4, 4, 47                                                          | 0.19                                                                                  | 0.84                                                                               |
| Sugarcane, shoot                     | 57, 7, 2, 22, 6, 6, 48                                                          | 0.19                                                                                  | 0.84                                                                               |
| Pigeonpea, pod + seed                | 60, 20, 2, 10, 4, 4, 48                                                         | 0.19                                                                                  | 0.84                                                                               |
| Fava bean, pod + seed                | 55, 29, 1, 7, 4, 4, 47                                                          | 0.19                                                                                  | 0.84                                                                               |
| Tomato, fruit                        | 54, 17, 4, 9, 8, 8, 46                                                          | 0.20                                                                                  | 0.84                                                                               |
| Chickpea, pod + seed                 | 65, 19, 6, 4, 3, 3, 48                                                          | 0.20                                                                                  | 0.83                                                                               |
| <b>High-lipid organs</b>             |                                                                                 |                                                                                       |                                                                                    |
| Sunflower, inflorescence + grain     | 45, 14, 22, 13, 3, 3, 55                                                        | 0.31                                                                                  | 0.76                                                                               |
| Soybean, pod + seed                  | 29, 37, 18, 6, 5, 5, 53                                                         | 0.32                                                                                  | 0.76                                                                               |
| Cotton, boll                         | 40, 21, 23, 8, 4, 4, 54                                                         | 0.33                                                                                  | 0.75                                                                               |
| Coconut                              | 39, 4, 28, 25, 2, 2, 59                                                         | 0.34                                                                                  | 0.74                                                                               |
| Groundnut, pod + seed                | 14, 27, 39, 14, 3, 3, 62                                                        | 0.42                                                                                  | 0.70                                                                               |
| Oil palm, palm nut                   | 37, 7, 48, 4, 2, 2, 61                                                          | 0.43                                                                                  | 0.70                                                                               |

Organs are arranged in order of  $g_{R,\text{local}}$  (rounded values are shown). Growth is from glucose and amides. Both  $g_{R,\text{local}}$  and  $Y_{G,\text{local}}$  include only costs of biosynthesis/polymerization and substrate uptake into growing cells (1 ATP for each glucose, amide and mineral). Carbon contents of organs, needed to express  $g_R$  and  $Y_G$  on a C basis, were calculated from Penning de Vries *et al.* (1983, Table 3) and Penning de Vries *et al.* (1989, Table 9). Note that  $g_R$  and  $Y_G$  in  $\text{kg kg}^{-1}$  differ from  $g_R$  and  $Y_G$  in  $\text{mol C (mol C)}^{-1}$  when C content of biomass differs from C content of substrate, as is usually the case.

important than a mass-based  $Y_G$ . Nonetheless, energy content (i.e. heat of combustion) is also an imperfect measure of the ‘useful’ yield of growth processes. For example, amino groups ( $-\text{NH}_2$ ) in proteins cannot be oxidized by animals, so even though some of the energy in substrate is retained in them, that energy is not available to animals (although amino groups are required in animal nutrition). Also, cellulose has high  $Y_G$  and  $Y_{G,E}$ , but cannot be used as a source of C or energy by many animals.

#### Calculating and measuring $g_R$

It is critical to realize that growth cost estimates from pathway analysis—or related short-cut methods based on Vertregt and Penning de Vries (1987) or Williams *et al.* (1987), both of which followed from McDermitt and Loomis’s (1981) theoretical analysis—are estimates of *minimum* cost for a specified substrate involving specified biosynthetic pathways. These methods are based on biomass composition, but composition is *not a measure of* the amount or type of substrate used in growth or the amount of growth respiration. These can be determined only through measurements of growth, respiration and/or substrate consumption. On the other hand, the pathway analysis and related short-cut methods will accurately estimate  $g_R$  and  $Y_G$  from plant composition if actual efficiency approaches potential efficiency and substrate is known. But it is also necessary to understand how composition may change with time (e.g. Mutsaers, 1976; Merino *et al.*, 1984; Thornley and Johnson, 1990, pp. 350–353; Walton *et al.*, 1990, 1999). For example, differentiation and secondary growth can occur after organs are normally considered ‘mature’; in particular, synthesis of lignins and hemicelluloses may be important in leaves after ‘full expansion’ but before senescence. And when acclimation occurs (e.g. in leaves in response to environmental change during canopy development), tissue composition can change. Thus, composition measurements used to calculate  $g_R$  must reflect amounts of compounds synthesized during growth (not just net compound accumulation) to be meaningful. In addition, mobilization and senescence processes in old organs require energy, but they are not accounted for in pathway-based estimates of growth costs; Penning de Vries *et al.* (1983) outlined theoretical mobilization costs, which can be particularly important during grain filling in many crops.

In addition to estimating minimum  $g_R$  from biochemical pathway stoichiometries, other methods can be used to evaluate  $g_R$ . For example,  $R_G$  can be estimated by deriving a theoretical or experimental estimate of  $R_M$  (using methods listed above) and then subtracting that  $R_M$  from measured total respiration  $R$  (e.g. Sprugel, 1990). This  $R_G$  then defines  $g_R$  from the relationship  $g_R = R_G/G$ . This method is the ‘reverse’ of evaluating  $R_G$  from measurements of  $G$  and composition-based estimates of  $g_R$  and then subtracting that  $R_G$  from measured  $R$  to estimate  $R_M$  (e.g. Mutsaers, 1976).

Values of  $g_R$  can also be evaluated by solving experimentally eqns (1), (2), or (3), or similar equations. Each approach to solving these equations has drawbacks

(Amthor, 1989), but measurements of  $G$  and  $R$  can provide a direct (rather than theoretical) estimate of  $g_R$ .

As with  $m_R$ , different methods of calculating or measuring  $g_R$  (or  $Y_G$ ) can give different results (e.g. Irving and Silsbury, 1987; Williams *et al.*, 1987; Lafitte and Loomis, 1988; Sprugel, 1990; Walton and de Jong, 1990; Walton *et al.*, 1990, 1999; Marcelis and Baan Hofman-Eijer, 1995; Ploschuk and Hall, 1997; Stockfors and Linder, 1998). Difficulties in accurately measuring composition of growing cells, measuring respiration throughout the day and night, and measuring growth can all affect estimates of  $g_R$  (and  $Y_G$ ).

### THE GENERAL PARADIGM

In the GMRP, all respiration is divided between growth and maintenance. The GMWRP adds a third term for wastage. From a biochemical/physiological perspective, finer distinctions than these two or three processes can be made, and these finer distinctions can be central to explaining respiratory behaviour and are the basis of the GP. That is, it is important to consider individual processes requiring support from respiration because they can vary independently in response to development and environmental changes. The basis for finer distinctions is illustrated above in decompositions of  $m_R$  and  $g_R$ . The general equation describing the GP (applicable to cells, organs, or whole plants) is:

$$R = \sum_{\text{processes}, Y} c_Y A_Y \quad (6)$$

(see also Thornley and Cannell, 2000), where  $Y$  is a process supported by respiration,  $c_Y$  is the metabolic cost of  $Y$  (in  $\text{CO}_2$  per unit activity of  $Y$ ), and  $A_Y$  is the rate (activity) of  $Y$ . [Note that activity  $A$  is used in eqn (6) whereas specific activity  $a$  was used in eqn (4) to define  $m_R$ .] Equation (6) is ‘complete’ when all quantitatively important processes supported by respiration are included.

Respiration associated with the processes of ‘local growth’ (i.e.  $g_{R,\text{local}}G$ ), macromolecular turnover associated with structure maintenance [i.e.  $(c_{\text{pt}}a_{\text{pt}} + c_{\text{lt}}a_{\text{lt}})W$ ], and ion-gradient maintenance associated with structure maintenance (i.e.  $c_{\text{ion}}a_{\text{ion}}W$ ) were outlined above. Four other processes are considered briefly (see Cannell and Thornley, 2000; Thornley and Cannell, 2000): active mineral uptake by roots,  $\text{NO}_3^-$  reduction, symbiotic  $\text{N}_2$  assimilation, and phloem loading. Other processes, including wastage, can be included in eqn (6) when appropriate.

#### Ion uptake

Active ion uptake into roots is generally supported by respiration, and the  $\text{CO}_2$  cost is directly related to  $1/Y_{\text{ATP,C}}$  if ATP [rather than NAD(P)H, see Marschner, 1995] is the energy source. Extensions to the GMRP explicitly accounting for this process were described by, e.g. Johnson (1983, 1990) and Bouma *et al.* (1996). Ions taken up can leak out of roots (perhaps more so in laboratory hydroponic experiments than in soils), so gross uptake exceeds net uptake. Respiration is related to gross uptake. (Uptake to

replace ions leaked from roots borders on maintenance, but is herein designated a part of the ‘separate’ process of ion uptake from the soil.)

Estimating uptake cost from biochemical principles is straightforward, though basic data are incomplete. In the context of respiration models,  $\text{NO}_3^-$  uptake is usually emphasized, with a possible uptake cost (in  $\text{CO}_2/\text{NO}_3^-$ ) of  $2/Y_{\text{ATP,C}}$  (Bouma *et al.*, 1996). This is equivalent to about 0.4  $\text{CO}_2/\text{NO}_3^-$  for maximum  $Y_{\text{ATP,C}}$ . Uptake of other ions, or  $\text{NO}_3^-$  in combination with other ions, may be considerably cheaper (Cannell and Thornley, 2000).

#### Nitrate reduction (and assimilation)

Costs of  $\text{NO}_3^-$  reduction can be paid by respiration (or photosynthesis in ‘green cells’ during the day). To reduce  $\text{NO}_3^-$  to  $\text{NH}_3$  using respiration, a cytosolic NADH and three plastidic NADPHs are required. These might be produced by plastidic activity of the OPPN (coupled with the oxaloacetate/malate shuttle to produce a cytosolic NADH from a plastidic NADPH) at a cost of about  $[2 + 1/(3Y_{\text{ATP,C}})] \text{CO}_2$  per  $\text{NO}_3^-$  [see eqn (11) in Amthor, 1994a]. Additional respiratory costs, separate from local growth, may be incurred for assimilating  $\text{NH}_3$  into amino acids. The ratio  $\text{CO}_2$  released per  $\text{NH}_3$  assimilated varies greatly depending on the fate of the N; indeed, for  $\text{NH}_3$  assimilated into aspartate, glutamate, asparagine and glutamine,  $\text{CO}_2$  fixation occurs (Pate and Layzell, 1990).

Equation (2) was extended to account separately for  $\text{NO}_3^-$  reduction and assimilation into amino acids by, e.g. Sasakawa and LaRue (1986). Their measurements indicated that 3.0  $\text{CO}_2$  were released per  $\text{NO}_3^-$  assimilated (assumed to be in asparagine) in *Vigna unguiculata* roots, but this cost probably included  $\text{NO}_3^-$  uptake as well.

#### Symbiotic $\text{N}_2$ fixation

Mahon (1977, 1979) expanded eqn (2) to include a respiratory component supporting  $\text{N}_2$  conversion to  $\text{NH}_3$  catalyzed by nitrogenase within symbionts. The minimum cost of  $\text{N}_2$  fixation may be 2.36  $\text{CO}_2$  per  $\text{NH}_3$  (Pate and Layzell, 1990).  $\text{N}_2$  fixation requires both ATP and reductant, so its cost is related to  $Y_{\text{ATP,C}}$ . Nodule growth and maintenance, and the concomitant respiration, are also required for  $\text{N}_2$  fixation. Of course, respiration supporting  $\text{N}_2$  fixation occurs only in plants assimilating  $\text{N}_2$ .

#### Phloem loading

Loading of sugars, amides, and other substances into phloem for transport to sinks is an active process. Growth, maintenance, ion uptake, respiration-supported N assimilation, and other processes are thereby supplied with substrates. Exceptions might be ‘nearly adult leaves’ which can ‘supply substrate for their own growth, for which no translocation costs are incurred’ (Penning de Vries, 1972), and mature ‘source’ leaves supplying their own substrates for maintenance.

A range of phloem sugar-loading costs—including costs of mobilizing reserves (notably starch) in source organs—

can be calculated from biochemical pathways of sugar (e.g. sucrose, sorbitol) ‘delivery’ to phloem and specific costs of phloem loading (e.g. apoplastic or entirely symplastic). For sucrose arising from chloroplast-starch mobilization with export of triose-P out of chloroplasts, three ATP are used per sucrose formed, whereas if maltose is the compound exported from chloroplasts, two ATP are needed per sucrose formed (Bouma *et al.*, 1995). With apoplastic phloem loading, one  $\text{H}^+$  (symport) is required per sucrose; ATP produces the  $\text{H}^+$  gradient used, perhaps with a 1:1  $\text{H}^+:\text{ATP}$  stoichiometry. Thus, for mobilization of starch to sucrose, followed by apoplastic phloem loading, three–four ATP are used per sucrose. The  $\text{CO}_2$  cost is therefore  $3/Y_{\text{ATP,C}}$  to  $4/Y_{\text{ATP,C}}$  (or 0.62–0.83  $\text{CO}_2$  with maximum  $Y_{\text{ATP,C}}$ ) per sucrose, or 0.05–0.07 mol  $\text{CO}_2$  (mol C translocated) $^{-1}$ . Penning de Vries (1975b) estimated that energy for sugar translocation could be supplied by an amount of sugar equal to 5.3% of the amount arriving in the sink [i.e. cost was 0.053 mol  $\text{CO}_2$  (mol C translocated) $^{-1}$ ]. That estimate was based on  $Y_{\text{ATP,C}} = 6.3$ . With  $Y_{\text{ATP,C}} = 4.8$  (Appendix 2), cost is 0.069  $\text{CO}_2/\text{C}$ . That cost was equally divided between source and sink, with the sink half part of  $g_{\text{R,local}}$ . Loading of other compounds, such as amides, into phloem will increase total phloem loading costs.

Cost of phloem loading of sugars (including mobilization) in source leaves can be experimentally estimated by simultaneously measuring rates of leaf respiration and C export. Costs covering the wide range from 0.47 to 3.8  $\text{CO}_2/\text{sucrose}$  (i.e. 0.039–0.32  $\text{CO}_2/\text{C}$ ) have been reported (Bouma *et al.*, 1995). For a number of experiments, respiration supporting phloem loading of sugars accounted for 7–55% (mean = 29%) of *Solanum tuberosum* L. and *Phaseolus vulgaris* L. mature-leaf dark respiration rates (Bouma *et al.*, 1995).

An important process related to translocation in some old vegetative tissue is protein breakdown to amides followed by translocation to growing organs. According to Penning de Vries *et al.* (1983), a net production of ATP occurs during the protein–amide conversion. That ATP can contribute to maintenance and transport processes, though it may be insufficient to fully support leaf maintenance needs.

## THE RATIO RESPIRATION/ PHOTOSYNTHESIS

Table A1 (Appendix 1) summarizes data-based estimates of the long-term (seasonal to annual) ratio respiration/photosynthesis (or  $R/P$ , where  $R$  and  $P$  have the same units) for whole plants or plant communities in the field. [Other  $R/P$  estimates are in references cited in Cannell and Thornley (2000).] Most values fall within the range 0.35–0.80, although it has been suggested that the ratio  $R/P$  is more conservative than this (references in Cannell and Thornley, 2000). But an important, related question is rarely asked: what is the ‘possible’ or ‘allowable’ range in  $R/P$  over a season or year? A minimum  $R/P$  is set by growth costs. Local growth for most higher plants may proceed with maximum  $Y_G$  of perhaps 0.80–0.85 mol C (mol C) $^{-1}$ , which is equivalent to minimum  $R/P$  of 0.15–0.20 mol C



(mol C)<sup>-1</sup>. When respiratory costs of ion uptake from the soil, active transport through phloem, and N assimilation are included, the minimum  $R/P$  may increase to about 0.20–0.30. Finally, some structure maintenance is essential, raising the *minimum* long-term  $R/P$  to perhaps 0.30–0.40 for most higher plants. At the other extreme, an  $R/P$  of unity means that no growth or biomass accumulation (including litter) occurs, which is never the case. Indeed, an  $R/P$  greater than, say, 0.75–0.85 would seem unlikely following the long evolutionary history of higher plants. Thus, I suggest that 0.35–0.80 is about the allowable range for  $R/P$  in whole plants over long periods. This full range is spanned by values in Table A1. But what if  $R/P$  is generally more conservative, say 0.45–0.60? That range is still as large as one third of the possible range. In short, available data are not precise, or comprehensive, enough to decide whether  $R/P$  is highly constrained across species and environments, and in fact, available data indicate that  $R/P$  covers a significant fraction of the possible range in values. Moreover, a decrease in  $R/P$  from 0.60 to 0.45 (25 %) reflects a large (37.5 %) increase in growth per unit photosynthesis (with no net change in amount of reserve material), so even apparently small variation in  $R/P$  can be significant.

Estimates of crop  $R/P$  are typically lower than values for ‘natural’ vegetation [compare Table 6.1 in Amthor, 1989 (which contains values of  $1 - R/P$ ), to Table A1 herein]. Relatively small values of  $R/P$  in crops might be related to the following: (1) a large fraction of growth and biomass in crops is in storage organs such as seeds and tubers, compared to a small fraction in other plants; (2) theoretical  $Y_{G,local}$  in storage organs of most tuber and grain crops is large [i.e. 0.83–0.89 (see Table 3)] so growth respiration is relatively small there; and (3) maintenance respiration in storage organs is probably usually slow. Thus, selecting crop genotypes for large harvest index may indirectly select for reduced whole-plant  $R/P$ .

Although  $R/P$  is probably a variable (not a constant), single-value summaries of  $R/P$  may sometimes be useful descriptions of general patterns. Single-value summaries will not, however, help explain relationships among photosynthesis, respiration and growth as they vary across environments and species.

## EFFECTS OF RISING TEMPERATURE AND CO<sub>2</sub> ON RESPIRATION

Ongoing global environmental change raises the question, how will rising CO<sub>2</sub> and temperature affect plant respiration during the coming decades?

### Temperature

A short-term (seconds to hours) temperature increase (over the physiologically relevant range) stimulates respiration rate, often with a  $Q_{10}$  of about 2.0–2.5, but over the long term (days to years), respiration may acclimate and/or adapt to temperature (e.g. Amthor, 1994b; Larigauderie and Körner, 1995; Arnone and Körner, 1997; Tjoelker *et al.*, 1999a). Short-term changes in temperature probably

affect respiration mainly through kinetic effects on the processes using respiratory products. Whether, and to what extent, processes supported by respiration acclimate and adapt to temperature probably determines effects of long-term temperature change on respiration. That is, in the long term, temperature probably affects respiration through its effects on growth and maintenance processes, and developmental state, rather than through changes in respiratory capacity or kinetics *per se*, though respiratory capacity may also be affected by long-term temperature change. As mentioned above, studies by Mariko and Koizumi (1993) and Marcelis and Baan Hofman-Eijer (1995) indicated that whole-plant and fruit  $m_R$  did not acclimate to temperature (and  $g_R$  was independent of temperature in those studies), but there are too few data available to make generalizations about temperature acclimation of  $m_R$  (if any).

Because of acclimation and/or adaptation, short-term responses of respiration to temperature need not reflect long-term responses. Stated another way, the ‘long-term  $Q_{10}$ ’ of respiration will generally be smaller than the ‘short-term  $Q_{10}$ ’ because of some degree of acclimation and/or adaptation.

Perhaps the most important issue is how growth will respond to warming. If warming enhances growth and plant size (for whatever reasons), it is likely that both growth respiration and maintenance respiration will be enhanced as well, though not necessarily in direct proportion. That is, the ratio  $R/P$  might be affected by warming. For example, Tjoelker *et al.* (1999b) found that  $R/P$  generally increased with warming in boreal-tree seedlings.

In the end, understanding effects of long-term warming on respiration will depend on knowledge of how warming affects: (1) rates of processes that require respiration as a source of C-skeletons, ATP and/or NAD(P)H; (2) specific respiratory costs of those processes; and (3) the value of  $Y_{ATP,C}$  and extent of any wastage respiration. Unfortunately, such knowledge is presently limited.

### Atmospheric CO<sub>2</sub> concentration

It is relatively easy to speculate on how (and why) rising CO<sub>2</sub> ‘should’, according to the GP, affect respiration rate. It is well known that elevated CO<sub>2</sub> enhances photosynthesis and plant growth (at least in C<sub>3</sub> plants, though C<sub>4</sub> plant growth can also be stimulated, perhaps in part due to increased water use efficiency). Increased photosynthesis and growth also stimulate translocation. Elevated CO<sub>2</sub> should, therefore, result in greater whole-plant respiration supporting growth and translocation as well as respiration supporting ion uptake and N assimilation (assuming that bigger plants contain more minerals and proteins). The resulting increase in plant size should in turn stimulate whole-plant maintenance respiration. Finally, elevated CO<sub>2</sub> often results in a higher proportion of nonstructural carbohydrates (i.e. reserve materials), and this might enhance respiration associated with wastage (e.g. Azcón-Bieto and Osmond, 1983; Tjoelker *et al.*, 1999a)—that is, ‘substrate-induced respiration’ of Warren Wilson (1967)—though it must be kept in mind that elevated nonstructural carbohydrate concentrations in source leaves may also

stimulate respiration through increased phloem loading and translocation. Thus, because elevated CO<sub>2</sub> stimulates photosynthesis, translocation, growth and nonstructural carbohydrates, it is expected that rising CO<sub>2</sub> will increase whole-plant respiration, and there is evidence for this response in elevated-CO<sub>2</sub> experiments (Amthor, 1997).

In addition to increased growth, elevated CO<sub>2</sub> can also cause lower protein concentrations, perhaps in part through 'dilution' by increased nonstructural carbohydrate levels. This response might be expected to reduce  $g_R$  and/or  $m_R$  (though not necessarily  $R_G$  and  $R_M$ , respectively), and there is evidence supporting these responses in several experiments (Amthor, 1997). [Many experimental estimates of  $g_R$  (and  $m_R$ ) fail to distinguish structural mass from reserves (and see Warren Wilson, 1967), so  $g_R$  is typically based on dry mass accumulation rather than growth *per se*. Thus, changes in  $g_R$  caused by elevated CO<sub>2</sub> may be *apparent* only, rather than *actual*.] On the other hand, leaf respiration per unit N was increased by elevated CO<sub>2</sub> in several tree species, and this was related to more nonstructural carbohydrates (Tjoelker *et al.*, 1999a). Reductions in  $g_R$  and/or  $m_R$ , or increases in nonstructural carbohydrate content, should reduce  $R/P$ , and there is evidence that this response is elicited in many experimental settings (Amthor, 1997). A reduction in  $R/P$  due to elevated CO<sub>2</sub> indicates that wastage respiration is not significantly increased.

As for temperature, the GP implies that rising CO<sub>2</sub> will influence respiration to the extent that it alters: (1) rates of processes supported by respiration; (2) stoichiometries between respiration and processes it supports; and (3) rates of futile cycling, alternative pathway activity, and other forms of wastage. And, as with temperature, the present database is limited. That is, generalizations made above are mainly based on simple correlations. There are too few simultaneous measurements of respiration and the processes it supports to draw firm conclusions or explanations.

Respiratory responses to elevated CO<sub>2</sub> brought about through changes in photosynthesis, translocation, growth, plant size, and/or plant composition are termed 'indirect' (Amthor, 1997) because the same respiratory responses would be expected if any other environmental factor (e.g. temperature, nutrient availability) caused the same changes in photosynthesis, translocation, growth, plant size, and/or plant composition. In addition to indirect effects of CO<sub>2</sub> on respiration, there has been considerable attention paid to 'direct' effects of CO<sub>2</sub> on respiration, in which CO<sub>2</sub> itself (in the dark for photosynthetic tissue) directly alters respiration rate (e.g. Amthor, 1997). Leaf, shoot, root, reproductive organ, and whole-plant respiration have all been reported to be directly inhibited by short-term increases in CO<sub>2</sub> concentration (reviewed in Amthor, 1997, with more recent research in Burton *et al.*, 1997; Ceulemans *et al.*, 1997; Reuveni and Bugbee, 1997; Clinton and Vose, 1999). Conversely, the respiration rate was independent of short-term CO<sub>2</sub> changes in many experiments (e.g. Amthor, 1997; Roberntz and Stockfors, 1998; Tjoelker *et al.*, 1999a; Amthor, 2000; and references therein). Mechanisms of any direct effect of CO<sub>2</sub> on respiration are unknown, although

an inhibition of cytochrome *c* oxidase activity could be partly responsible (González-Meler and Siedow, 1999). It is also possible that CO<sub>2</sub> directly affects some process(es) that uses the products of respiration, rather than affecting respiration *per se*.

In some cases, direct inhibition of respiration by elevated CO<sub>2</sub> may enhance C balance, implying that wastage respiration is reduced by elevated CO<sub>2</sub>, whereas in other cases a direct inhibition of respiration by elevated CO<sub>2</sub> can reduce growth, implying that a useful fraction of respiration (or a useful process using the products of respiration) is affected (e.g. Bunce, 1995; Reuveni and Bugbee, 1997; Reuveni *et al.*, 1997). Potential direct effects of CO<sub>2</sub> on respiration remain a puzzling topic. Additional experiments are needed, not only to establish mechanisms, but to better ascertain whether the response even occurs in most plants (Amthor, 2000).

#### STATE OF THE PARADIGMS AND FUTURE RESEARCH DIRECTIONS

By 1970, phenomenological equations summarizing the GMRP were applied to plants (Monsi, 1968; de Wit and Brouwer, 1969; McCree, 1969, 1970; de Wit *et al.*, 1970; Sawada, 1970; Thornley, 1970), and by 1975, principles relating plant growth and maintenance processes to underlying biochemistry and the related respiration were worked out in considerable detail (Penning de Vries, 1972, 1974, 1975a,b; Penning de Vries *et al.*, 1974). The latter formed a basis of quantitative research within the GP. Thus, while theoretical and experimental refinements continue today, the paradigms were relatively well developed 25–30 years ago.

Because the GP has firm physiological and biochemical underpinnings, it is the appropriate approach for explaining respiration rates (or amounts), and is in contrast to simple empirical relationships between respiration and factors such as temperature and plant dry mass or surface area. Although the two-component subset of the GP—i.e. the GMRP—is often useful (e.g. Marcelis and Baan Hofman-Eijer, 1995; Amthor, 1997; Kellomäki and Wang, 1998; and references therein), fuller versions of the GP (e.g. Johnson, 1990; Amthor, 1994a; Cannell and Thornley, 2000) enhance understanding of roles of respiration in plant growth and health and can better indicate specific targets for research.

While it is clear that respiration supports growth, maintenance and other processes at the biochemical level as outlined by Penning de Vries (1972, 1974, 1975a,b) and Penning de Vries *et al.* (1974, 1983), and more recently by Bouma *et al.* (1995, 1996) and Cannell and Thornley (2000) among others, it remains difficult to measure that support based on CO<sub>2</sub> (or O<sub>2</sub>) exchange. Improved measurements of respiration and the processes it supports are needed. In particular, *simultaneous* measurements of rates of respiration and processes supported by respiration are needed to relate respiration to those processes. If those measurements can be made in the field, all the better, but field measurements must distinguish plants from any associated heterotrophic organisms. This is particularly difficult when studying root respiration. Moreover, simultaneous

photosynthesis complicates measurements of daytime respiration in ‘green cells’. In any case, isolated respiration measurements are of limited value. For example, measurements of respiratory response to temperature without simultaneous measurements of processes using respiratory products do not contribute to explanations of respiration rate.

To the extent that metabolic costs of processes supported by respiration can be measured, they may differ from costs calculated from underlying biochemistry for several reasons, including ignorance of *in situ* biochemical stoichiometries. Nonetheless, discrepancies between measured and calculated metabolic efficiencies may indicate processes that could be targeted for improvement through breeding or biotechnology.

It is essential to consider  $g_R$ ,  $m_R$  and other respiratory coefficients as variables, not constants (McCree, 1988). Although each may remain about constant during some periods, they change with time (during and among days, during and among seasons) in other circumstances. This follows directly from underlying biochemical principles. Thus, even if  $g_R$  or  $m_R$  (or other coefficients) are accurately measured at a point in time and space, that value may be inapplicable to other times/locations because efficiency of respiration and factors controlling  $g_R$  (e.g. nature of substrates and biomass formed) and  $m_R$  (e.g. rate of intracellular ion leakage) change in response to environment and during ontogeny (Penning de Vries, 1972; McCree, 1974; Mutsaers, 1976). Unfortunately, when respiration is included in models of plant growth and ecosystem primary production, a simplistic form of the GMRP is usually used (with constant  $g_R$ , and  $m_R$  responding only to temperature). Future modelling should include more detailed treatments of respiration to increase realism and to better match the models to underlying processes (see Thornley and Cannell, 2000).

It is usually implicit that the respiration rate is regulated by rates of processes that use respiratory products rather than by capacity of respiratory pathways or availability of respiratory substrates (e.g. Beevers, 1974). In some cases, however, substrate availability limits respiration rate (e.g. in mature *Spinacia oleracea* L. leaves studied by Noguchi and Terashima, 1997), and respiratory capacity in young, rapidly growing tissues might limit respiration rate in those tissues. In such cases, respiratory substrate availability or respiratory capacity may regulate rates of growth, maintenance, and other processes, rather than the converse. Too few data are available to determine whether stoichiometries between respiration and the processes it supports are affected by these various controls on respiration rates.

A question of practical import is, why haven’t the paradigms been more useful in crop breeding? The same question applies to e.g. the successful  $C_3$ -photosynthesis model of Farquhar *et al.* (1980). The answer may be as simple as Evans’s (1993, p. 266) claim that ‘selection for greater yield potential has not, could not and never shall wait on our fuller understanding of its functional basis, despite the pleas of physiologists’. So although it is disappointing that the paradigms have so far been unsuccessful

in contributing to major crop improvements—in spite of early hopes surrounding the work of Wilson (1975) with *Lolium perenne*—this does not alter their ‘correctness’ or explanatory power.

In summary, beginning 30 years ago, the models of McCree (1969, 1970), de Wit *et al.* (1970, 1978), Thornley (1970), Penning de Vries (1972, 1975a,b), and Penning de Vries *et al.* (1974) shed considerable light on the role of respiration in plant growth and health. They added a needed quantitative aspect to studies of respiration. Although the 1969–75 advances were large, and progress has continued to the present, research is still needed. Targets of future work include updating models with evolving biochemical knowledge and improving methods of measuring rates of respiration and the processes it supports. The following questions are offered as guides for research.

- (1) Can robust, direct methods of measuring growth and respiration in intact plants be developed?
- (2) What are magnitudes of *in situ* maintenance processes across plants and ecosystems, how are they affected by growth rate and environment, and in leaves, how much maintenance is supported directly by photosynthesis?
- (3) What is *in situ*  $Y_{ATP,C}$  and is there a widespread otiose component of respiration—as suggested by Reuveni *et al.* (1997) for conditions favourable for photosynthesis—and how do growth rate, ontogeny and environment affect them?
- (4) Can non-growth-related respiration in crop plants be slowed (thereby enhancing productivity through improved substrate supply to growth) by reducing wastage respiration or eliminating some maintenance activities that are unnecessary, as proposed by Penning de Vries (1974)?
- (5) Can the conclusion of Penning de Vries (1974), Penning de Vries and van Laar (1977), and Penning de Vries *et al.* (1983) that actual growth occurs with near maximum (potential) efficiency be re-evaluated in light of present biochemical knowledge and with new growth and respiration measurements designed specifically to test this notion, especially in the field?

#### ACKNOWLEDGEMENTS

David Lawlor, Bob Loomis, Keith McCree, Dayle McDermitt, Frits Penning de Vries, John Thornley and Kim Williams read early, long drafts of this paper and returned hundreds of insightful comments; two anonymous reviewers provided critical input; and Rowdie Goodbody (deceased) was continually encouraging. Financial support was from the DOE/NSF/NASA/USDA/EPA Interagency Program on Terrestrial Ecology and Global Change (TECO) by the US Department of Energy’s Office of Biological and Environmental Research under contract DE-AC05-96OR22464 with Lockheed Martin Energy Research Corporation.



## LITERATURE CITED

- Amthor JS. 1989.** *Respiration and crop productivity*. New York: Springer Verlag.
- Amthor JS. 1994a.** Respiration and carbon assimilate use. In: Boote KJ, Bennett JM, Sinclair TR, Paulsen GM, eds. *Physiology and determination of crop yield*. Wisconsin, Madison: American Society of Agronomy, 221–250.
- Amthor JS. 1994b.** Plant respiratory responses to the environment and their effects on the carbon balance. In: Wilkinson RE, ed. *Plant–environment interactions*. New York: Marcel Dekker, 501–554.
- Amthor JS. 1997.** Plant respiratory responses to elevated carbon dioxide partial pressure. In: Allen LH Jr., Kirkham MB, Olszyk DM, Whitman CE, eds. *Advances in carbon dioxide effects research*. Wisconsin, Madison: American Society of Agronomy, 35–77.
- Amthor JS. 2000.** Direct effect of elevated CO<sub>2</sub> on nocturnal *in situ* leaf respiration in nine temperate deciduous tree species is small. *Tree Physiology* 20: 139–144.
- Andrews R, Coleman DC, Ellis JE, Singh JS. 1974.** Energy flow relationships in a shortgrass prairie ecosystem. In: Cave AJ, ed. *Proceedings of the First International Congress of Ecology*. Wageningen, The Netherlands: Pudoc, 22–28.
- Arnone JA III, Körner C. 1997.** Temperature adaptation and acclimation potential of leaf dark respiration in two species of *Ranunculus* from warm and cold habitats. *Arctic and Alpine Research* 29: 122–125.
- Audus LJ. 1960.** Effect of growth-regulating substances on respiration. In: Ruhland W, ed. *Encyclopedia of plant physiology, vol XII, plant respiration inclusive fermentations and acid metabolism, part 2*. Berlin: Springer-Verlag, 360–387.
- Azcón-Bieto J, Osmond CB. 1983.** Relationship between photosynthesis and respiration. *Plant Physiology* 71: 574–581.
- Barnes A, Hole CC. 1978.** A theoretical basis of growth and maintenance respiration. *Annals of Botany* 42: 1217–1221.
- Bauchop T, Elsdon SR. 1960.** The growth of micro-organisms in relation to their energy supply. *Journal of General Microbiology* 23: 457–469.
- Beevers H. 1961.** *Respiratory metabolism in plants*. Illinois, Evanston: Row, Peterson and Company.
- Beevers H. 1969.** Respiration in plants and its regulation. In: Šetlík I, ed. *Productivity of photosynthetic systems: models and methods (Preliminary texts of invited papers received by 10 April 1969)*. Třeboň, Czechoslovakia: International Biological Programme, Intersectional Photosynthesis Liaison Group, Czechoslovak National Committee (Czechoslovak Academy of Sciences: Institute of Microbiology, Laboratory of Algology), 64–69.
- Beevers H. 1970.** Respiration in plants and its regulation. In: Šetlík I, ed. *Prediction and measurement of photosynthetic productivity*. Wageningen, The Netherlands: Centre for Agricultural Publishing and Documentation, 209–214.
- Beevers H. 1974.** Conceptual developments in metabolic control, 1924–1974. *Plant Physiology* 54: 437–442.
- Bouma TJ, Broekhuysen AGM, Veen BW. 1996.** Analysis of root respiration of *Solanum tuberosum* as related to growth, ion uptake and maintenance of biomass. *Plant Physiology and Biochemistry* 34: 795–806.
- Bouma TJ, de Visser R, Van Leeuwen PH, de Kock MJ, Lambers H. 1995.** The respiratory energy requirements involved in nocturnal carbohydrate export from starch-storing mature source leaves and their contribution to leaf dark respiration. *Journal of Experimental Botany* 46: 1185–1194.
- Bouma TJ, de Visser R, Janssen JHJA, de Kock MJ, van Leeuwen PH, Lambers H. 1994.** Respiratory energy requirements and rate of protein turnover *in vivo* determined by the use of an inhibitor of protein synthesis and a probe to assess its effect. *Physiologia Plantarum* 92: 585–594.
- Breeze V, Elston J. 1983.** Examination of a model and data describing the effect of temperature on the respiration rate of crop plants. *Annals of Botany* 51: 611–616.
- Byrd GT, Sage RF, Brown RH. 1992.** A comparison of dark respiration between C<sub>3</sub> and C<sub>4</sub> plants. *Plant Physiology* 100: 191–198.
- Bunce JA. 1995.** Effects of elevated carbon dioxide concentration in the dark on the growth of soybean seedlings. *Annals of Botany* 75: 365–368.
- Burton AJ, Zogg GP, Pregitzer KS, Zak DR. 1997.** Effect of measurement CO<sub>2</sub> concentration on sugar maple root respiration. *Tree Physiology* 17: 421–427.
- Cannell MGR, Thornley JHM. 2000.** Modelling the components of plant respiration: some guiding principles. *Annals of Botany* 85: 45–54.
- Canvin DT. 1970a.** Discussion section 3: Losses in energy transformation in relation to the use of photosynthates for growth and maintenance of photosynthetic systems. In: Šetlík I, ed. *Prediction and measurement of photosynthetic productivity*. Wageningen, The Netherlands: Centre for Agricultural Publishing and Documentation, 251–257.
- Canvin DT. 1970b.** Summary section 3: Losses in energy transformation in relation to the use of photosynthates for growth and maintenance of photosynthetic systems. In: Šetlík I, ed. *Prediction and measurement of photosynthetic productivity*. Wageningen, The Netherlands: Centre for Agricultural Publishing and Documentation, 259–261.
- Ceulemans R, Taylor G, Bosac C, Wilkins D, Besford RT. 1997.** Photosynthetic acclimation to elevated CO<sub>2</sub> in poplar grown in glasshouse cabinets or in open top chambers depends on duration of exposure. *Journal of Experimental Botany* 48: 1681–1689.
- Challa H. 1976.** An analysis of the diurnal course of growth, carbon dioxide exchange and carbohydrate reserve content of cucumber. *Agricultural Research Report 861*. Wageningen: Center for Agrobiological Research.
- Chung H-H, Barnes RL. 1977.** Photosynthate allocation in *Pinus taeda*. I. Substrate requirements for synthesis of shoot biomass. *Canadian Journal of Forest Research* 7: 106–111.
- Clinton BD, Vose JM. 1999.** Fine root respiration in mature eastern white pine (*Pinus strobus*) *in situ*: the importance of CO<sub>2</sub> in controlled environments. *Tree Physiology* 19: 475–479.
- Denison RF, Nobel PS. 1988.** Growth of *Agave deserti* without current photosynthesis. *Photosynthetica* 22: 51–57.
- Detling JK. 1979.** Processes controlling blue grama production on the shortgrass prairie. In: French NR, ed. *Perspectives in grassland ecology*. New York: Springer-Verlag, 25–42.
- de Visser R, Spitters CJT, Bouma TJ. 1992.** Energy cost of protein turnover: theoretical calculation and experimental estimation from regression of respiration on protein concentration of full-grown leaves. In: Lambers H, Van der Plas LHW, eds. *Molecular, biochemical and physiological aspects of plant respiration*. The Hague: SPB Academic Publishing, 493–508.
- de Wit CT, Brouwer R. 1969.** The simulation of photosynthesis systems. In: Šetlík I, ed. *Productivity of photosynthetic systems: models and methods (Preliminary texts of invited papers received by 10 April 1969)*. Třeboň, Czechoslovakia: International Biological Programme, Intersectional Photosynthesis Liaison Group, Czechoslovak National Committee (Czechoslovak Academy of Sciences: Institute of Microbiology, Laboratory of Algology), 16–32.
- de Wit CT, Brouwer R, Penning de Vries FWT. 1970.** The simulation of photosynthetic systems. In: Šetlík I, ed. *Prediction and measurement of photosynthetic productivity*. Wageningen, The Netherlands: Centre for Agricultural Publishing and Documentation, 47–70.
- de Wit CT et al. 1978.** *Simulation of assimilation, respiration and transpiration of crops*. Wageningen, The Netherlands: Centre for Agricultural Publishing and Documentation.
- Earl HJ, Tollenaar M. 1998.** Differences among commercial maize (*Zea mays* L.) hybrids in respiration rates of mature leaves. *Field Crops Research* 59: 9–19.
- Edwards NT, Hanson PJ. 1996.** Stem respiration in a closed-canopy upland oak forest. *Tree Physiology* 16: 433–439.
- Edwards NT, Shugart HH Jr., McLaughlin SB, Harris WF, Reichle DE. 1981.** Carbon metabolism in terrestrial ecosystems. In: Reichle DE, ed. *Dynamic properties in forest ecosystems*. Cambridge: Cambridge University Press, 499–536.
- Evans LT. 1970.** Summary section 5: Controlled environments in analysis of photosynthetic characteristics. In: Šetlík I, ed. *Prediction and measurement of photosynthetic productivity*. Wagon-

- ingen, The Netherlands: Centre for Agricultural Publishing and Documentation, 421–426.
- Evans LT. 1993.** *Crop evolution, adaptation and yield*. Cambridge: Cambridge University Press.
- Farquhar GD, Caemmerer S von, Berry JA. 1980.** A biochemical model of photosynthetic CO<sub>2</sub> assimilation in leaves of C<sub>3</sub> species. *Planta* **149**: 78–90.
- Forrest WW, Walker DJ. 1971.** The generation and utilization of energy during growth. *Advances in Microbial Physiology* **5**: 213–274.
- Gaastra P. 1963.** Climatic control of photosynthesis and respiration. In: Evans LT, ed. *Environmental control of plant growth*. New York and London: Academic Press, 113–138.
- Gershenson J. 1994.** Metabolic costs of terpenoid accumulation in higher plants. *Journal of Chemical Ecology* **20**: 1281–1328.
- González-Meler MA, Siedow JN. 1999.** Direct inhibition of mitochondrial respiratory enzymes by elevated CO<sub>2</sub>: does it matter at the tissue or whole-plant level? *Tree Physiology* **19**: 253–259.
- Gunsalus IC, Shuster CW. 1961.** Energy-yielding metabolism in bacteria. In: Gunsalus IC, Stanier RY, eds. *The bacteria: a treatise on structure and function, Volume II, Metabolism*. New York and London: Academic Press, 1–58.
- Hagihara A, Hozumi K. 1991.** Respiration. In: Raghavendra AS, ed. *Physiology of trees*. New York: Wiley, 87–110.
- Harris WF, Sollins P, Edwards NT, Dinger BE, Shugart HH. 1975.** Analysis of carbon flow and productivity in a temperate deciduous forest ecosystem. In: Reichle DE, Franklin JF, Goodall DW, eds. *Productivity of world ecosystems*. Washington, DC: National Academy of Sciences, 116–122.
- Hesketh JD, Baker DN, Duncan WG. 1971.** Simulation of growth and yield in cotton: respiration and the carbon balance. *Crop Science* **11**: 394–398.
- Hiroi T, Monsi M. 1964.** Physiological and ecological analyses of shade tolerance of plants. 4. Effect of shading on distribution of photosynthate in *Helianthus annuus*. *Botanical Magazine, Tokyo* **77**: 1–9.
- Irving DE, Silsbury JH. 1987.** A comparison of the rate of maintenance respiration in some crop legumes and tobacco determined by three methods. *Annals of Botany* **59**: 257–264.
- Irving DE, Silsbury JH. 1988.** The respiration of mature field bean (*Vicia faba* L.) leaves during prolonged darkness. *Annals of Botany* **62**: 473–479.
- James WO. 1953.** *Plant respiration*. London: Oxford University Press.
- Johnson IR. 1983.** Nitrate uptake and respiration in roots and shoots: a model. *Physiologia Plantarum* **58**: 145–147.
- Johnson IR. 1990.** Plant respiration in relation to growth, maintenance, ion uptake and nitrogen assimilation. *Plant, Cell and Environment* **13**: 319–328.
- Jones MB, Leafe EL, Stiles W, Collett B. 1978.** Pattern of respiration of a perennial ryegrass crop in the field. *Annals of Botany* **42**: 693–703.
- Kellomäki S, Wang K-Y. 1998.** Growth, respiration and nitrogen content in needles of Scots pine exposed to elevated ozone and carbon dioxide in the field. *Environmental Pollution* **101**: 263–274.
- Kinerson RS. 1975.** Relationships between plant surface area and respiration in loblolly pine. *Journal of Applied Ecology* **12**: 965–971.
- Kira T. 1975.** Primary production of forests. In: Cooper JP, ed. *Photosynthesis and productivity in different environments*. New York: Cambridge University Press, 5–40.
- Kira T, Yabuki K. 1978.** Primary production rates in the Minamata Forest. In: Kira T, Ono Y, Hosokawa T, eds. *Biological production in a warm-temperate evergreen oak forest of Japan*. Tokyo: University of Tokyo Press, 131–138.
- Kraus E, Aydemir Y, Duin S, Kollöffel C, Lambers H. 1993.** Yield advantage of a ‘slow-’ over a ‘fast-’ respiring population of *Lolium perenne* cv. S23 depends on plant density. *New Phytologist* **123**: 39–44.
- Lafitte HR, Loomis RS. 1988.** Calculation of growth yield, growth respiration and heat content of grain sorghum from elemental and proximal analyses. *Annals of Botany* **62**: 353–361.
- Lake JV, Anderson MC. 1970.** Discussion section 1: Dynamics of development of photosynthetic systems. In: Setlík I, ed. *Prediction and measurement of photosynthetic productivity*. Wageningen, The Netherlands: Centre for Agricultural Publishing and Documentation, 131–136.
- Lammers H. 1979.** *Energy metabolism in higher plants in different environments*. PhD Thesis, Rijksuniversiteit te Groningen, The Netherlands.
- Larigauderie A, Körner C. 1995.** Acclimation of leaf dark respiration to temperature in alpine and lowland plant species. *Annals of Botany* **76**: 245–252.
- Lavigne MB, Ryan MG. 1997.** Growth and maintenance respiration rates of aspen, black spruce and jack pine stems at northern and southern BOREAS sites. *Tree Physiology* **17**: 543–551.
- Lavigne MB, Franklin SE, Hunt ER Jr. 1996.** Estimating stem maintenance respiration rates of dissimilar balsam fir stands. *Tree Physiology* **16**: 687–695.
- Law BE, Ryan MG, Anthoni PM. 1999.** Seasonal and annual respiration of a ponderosa pine ecosystem. *Global Change Biology* **5**: 169–182.
- Li M, Jones MB. 1992.** Effect of nitrogen status on the maintenance respiration of C<sub>3</sub> and C<sub>4</sub> *Cyperus* species. In: Lambers H, Van der Plas LHW, eds. *Molecular, biochemical and physiological aspects of plant respiration*. The Hague: SPB Academic Publishing, 509–514.
- Loomis RS. 1970.** Summary section 1: Dynamics of development of photosynthetic systems. In: Setlík I, ed. *Prediction and measurement of photosynthetic productivity*. Wageningen, The Netherlands: Centre for Agricultural Publishing and Documentation, 137–141.
- Loomis RS, Rabbinge R, Ng E. 1979.** Explanatory models in crop physiology. *Annual Review of Plant Physiology* **30**: 339–367.
- McCree KJ. 1969.** An equation for the rate of respiration of white clover plants grown under controlled conditions. In: Setlík I, ed. *Productivity of photosynthetic systems: models and methods (Preliminary texts of invited papers received by 10 April 1969)*. Trěboň, Czechoslovakia: International Biological Programme, Intersectoral Photosynthesis Liaison Group, Czechoslovak National Committee (Czechoslovak Academy of Sciences: Institute of Microbiology, Laboratory of Algology), 70–76.
- McCree KJ. 1970.** An equation for the rate of respiration of white clover plants grown under controlled conditions. In: Setlík I, ed. *Prediction and measurement of photosynthetic productivity*. Wageningen: Centre for Agricultural Publishing and Documentation, 221–229.
- McCree KJ. 1974.** Equations for the rate of dark respiration of white clover and grain sorghum, as functions of dry weight, photosynthetic rate, and temperature. *Crop Science* **14**: 509–514.
- McCree KJ. 1982.** Maintenance requirements of white clover at high and low growth rates. *Crop Science* **22**: 345–351.
- McCree KJ. 1983.** Carbon balance as a function of plant size in sorghum plants. *Crop Science* **23**: 1173–1177.
- McCree KJ. 1985.** This week’s citation classic<sup>®</sup>. *Current Contents* No. 39: 20 (September 30).
- McCree KJ. 1986.** Measuring the whole-plant daily carbon balance. *Photosynthetica* **20**: 82–93.
- McCree KJ. 1988.** Sensitivity of sorghum grain yield to ontogenetic changes in respiration coefficients. *Crop Science* **28**: 114–120.
- McCree KJ, Amthor ME. 1982.** Effects of diurnal variation in temperature on the carbon balances of white clover plants. *Crop Science* **22**: 822–827.
- McCree KJ, Silsbury JH. 1978.** Growth and maintenance requirements of subterranean clover. *Crop Science* **18**: 13–18.
- McCree KJ, Troughton JH. 1966a.** Prediction of growth rate at different light levels from measured photosynthesis and respiration rates. *Plant Physiology* **41**: 559–566.
- McCree KJ, Troughton JH. 1966b.** Non-existence of an optimum leaf area index for the production rate of white clover grown under constant conditions. *Plant Physiology* **41**: 1615–1622.
- McCullough DE, Hunt LA. 1989.** Respiration and dry matter accumulation around the time of anthesis in field stands of winter wheat (*Triticum aestivum*). *Annals of Botany* **63**: 321–329.
- McDermitt DK, Loomis RS. 1981.** Elemental composition of biomass and its relation to energy content, growth efficiency, and growth yield. *Annals of Botany* **48**: 275–290.

- Mahon JD. 1977.** Root and nodule respiration in relation to acetylene reduction in intact nodulated peas. *Plant Physiology* **60**: 812–816.
- Mahon JD. 1979.** Environmental and genotypic effects on the respiration associated with symbiotic nitrogen fixation in peas. *Plant Physiology* **63**: 892–897.
- Maier CA, Zarnoch SJ, Dougherty PM. 1998.** Effects of temperature and tissue nitrogen on dormant season stem and branch respiration in a young loblolly pine (*Pinus taeda*) plantation. *Tree Physiology* **18**: 11–20.
- Marcelis LFM, Baan Hofman-Eijer LR. 1995.** Growth and maintenance respiratory costs of cucumber fruits as affected by temperature, and ontogeny and size of the fruits. *Physiologia Plantarum* **93**: 484–492.
- Mariko S, Koizumi H. 1993.** Respiration for maintenance and growth in *Reynoutria japonica* ecotypes from different altitudes on Mt Fuji. *Ecological Research* **8**: 241–246.
- Marschner H. 1995.** *Mineral nutrition of plants, 2nd edn.* London: Academic Press.
- Matile P, Hörtensteiner S, Thomas H. 1999.** Chlorophyll degradation. *Annual Review of Plant Physiology and Plant Molecular Biology* **50**: 67–95.
- Merino J, Field C, Mooney HA. 1984.** Construction and maintenance costs of mediterranean-climate evergreen and deciduous leaves. *Acta Oecologica/Oecologia Plantarum* **5**: 211–229.
- Millar AH, Atkin OK, Menz RI, Henry B, Farquhar G, Day DA. 1998.** Analysis of respiratory chain regulation in roots of soybean seedlings. *Plant Physiology* **117**: 1083–1093.
- Möller CM, Müller D, Nielsen J. 1954.** Graphic presentation of dry matter production of European beech. *Det Forstlige Forsøgsvæsen i Danmark* **21**: 327–335.
- Monsi M. 1968.** Mathematical models of plant communities. In: Eckardt FE, ed. *Functioning of terrestrial ecosystems at the primary production level.* Paris: United Nations Educational, Scientific and Cultural Organization, 131–149.
- Monsi M, Murata Y. 1970.** Development of photosynthetic systems as influenced by distribution of matter. In: Setlík I, ed. *Prediction and measurement of photosynthetic productivity.* Wageningen, The Netherlands: Centre for Agricultural Publishing and Documentation, 115–129.
- Moser LE, Volenec JJ, Nelson CJ. 1982.** Respiration, carbohydrate content, and leaf growth of tall fescue. *Crop Science* **22**: 781–786.
- Müller D, Nielsen J. 1965.** Production brute, pertes par respiration et production nette dans la forêt ombrophile tropicale. *Det Forstlige Forsøgsvæsen i Danmark* **29**: 69–160.
- Mutsaers HJW. 1976.** Growth and assimilate conversion of cotton bolls (*Gossypium hirsutum* L.) 1. Growth of fruits and substrate demand. *Annals of Botany* **40**: 301–315.
- Nicholls DG, Ferguson SJ. 1992.** *Bioenergetics 2.* London: Academic Press.
- Noguchi K, Terashima I. 1997.** Different regulation of leaf respiration between *Spinacia oleracea*, a sun species, and *Alocasia odora*, a shade species. *Physiologia Plantarum* **101**: 1–7.
- Odum HT. 1970.** An emerging view of the ecological system at El Verde. In: Odum HT, Pigeon RF, eds. *A tropical rain forest.* Washington, DC: US Atomic Energy Commission, I-191–I-289.
- Olson JS. 1964.** Gross and net production of terrestrial vegetation. *Journal of Ecology* **52**: 99–118 (Supplement).
- Pate JS, Layzell DB. 1990.** Energetics and biological costs of nitrogen assimilation. In: Mifflin BF, Lea PJ, eds. *The biochemistry of plants. Volume 16. Intermediary nitrogen metabolism.* San Diego: Academic Press, 1–42.
- Penning de Vries FWT. 1972.** Respiration and growth. In: Rees AR, Cockshull KE, Hand DW, Hurd RJ, eds. *Crop processes in controlled environments.* London: Academic Press, 327–347.
- Penning de Vries FWT. 1974.** Substrate utilization and respiration in relation to growth and maintenance in higher plants. *Netherlands Journal of Agricultural Science* **22**: 40–44.
- Penning de Vries FWT. 1975a.** The cost of maintenance processes in plant cells. *Annals of Botany* **39**: 77–92.
- Penning de Vries FWT. 1975b.** The use of assimilates in higher plants. In: Cooper JP, ed. *Photosynthesis and productivity in different environments.* New York: Cambridge University Press, 459–480.
- Penning de Vries FWT, van Laar HH. 1977.** Substrate utilization in germinating seeds. In: Landsberg JJ, Cutting CV, eds. *Environmental effects on crop physiology.* London: Academic Press, 217–228.
- Penning de Vries FWT, Brunsting AHM, Van Laar HH. 1974.** Products, requirements and efficiency of biosynthesis: a quantitative approach. *Journal of Theoretical Biology* **45**: 339–377.
- Penning de Vries FWT, Van Laar HH, Chardon MCM. 1983.** Bioenergetics of growth of seeds, fruits, and storage organs. In: Smith WH, Banata SJ, eds. *Potential productivity of field crops under different environments.* Los Baños, Laguna, Philippines: International Rice Research Institute, 37–59.
- Penning de Vries FWT, Witlage JM, Kremer D. 1979.** Rates of respiration and of increase in structural dry matter in young wheat, ryegrass and maize plants in relation to temperature, to water stress and to their sugar content. *Annals of Botany* **44**: 595–609.
- Penning de Vries FWT, Jansen DM, ten Berge HFM, Bakema A. 1989.** *Simulation of ecophysiological processes of growth in several annual crops.* Wageningen, The Netherlands: Centre for Agricultural Publishing and Documentation.
- Pirt SJ. 1965.** The maintenance energy of bacteria in growing cultures. *Proceedings of the Royal Society of London, Series B* **163**: 224–231.
- Plaxton WC. 1996.** The organization and regulation of plant glycolysis. *Annual Review of Plant Physiology and Plant Molecular Biology* **47**: 185–214.
- Ploschuk EL, Hall AJ. 1997.** Maintenance respiration coefficient for sunflower grains is less than that for the entire capitulum. *Field Crops Research* **49**: 147–157.
- Reichle DE. 1975.** Advances in ecosystem analysis. *BioScience* **25**: 257–264.
- Reuveni J, Bugbee B. 1997.** Very high CO<sub>2</sub> reduces photosynthesis, dark respiration and yield in wheat. *Annals of Botany* **80**: 539–546.
- Reuveni J, Gale J, Zeroni M. 1997.** Differentiating day and night effects of high ambient [CO<sub>2</sub>] on the gas exchange and growth of *Xanthium strumarium* L. exposed to salinity stress. *Annals of Botany* **79**: 191–196.
- Risser PG, Birney EC, Blocker HD, May SW, Parton WJ, Wiens JA. 1981.** *The true prairie ecosystem.* Stroudsburg, PA: Hutchinson Ross.
- Robertz P, Stockfors J. 1998.** Effects of elevated CO<sub>2</sub> concentration and nutrition on net photosynthesis, stomatal conductance and needle respiration of field-grown Norway spruce trees. *Tree Physiology* **18**: 233–241.
- Robson MJ, Parsons AJ. 1981.** Respiratory efflux of carbon dioxide from mature and meristematic tissue of unculm barley during eighty hours of continuous darkness. *Annals of Botany* **48**: 727–731.
- Ryan MG. 1990.** Growth and maintenance respiration in stems of *Pinus contorta* and *Picea engelmannii*. *Canadian Journal of Forest Research* **20**: 48–57.
- Ryan MG. 1991.** The effect of climate change on plant respiration. *Ecological Applications* **1**: 157–167.
- Ryan MG. 1995.** Foliar maintenance respiration of subalpine and boreal trees and shrubs in relation to nitrogen content. *Plant, Cell and Environment* **18**: 765–772.
- Ryan MG, Lavigne MB, Gower ST. 1997.** Annual carbon cost of autotrophic respiration in boreal forest ecosystems in relation to species and climate. *Journal of Geophysical Research* **102**: 28,871–28,883.
- Ryan MG, Linder S, Vose JM, Hubbard RM. 1994.** Dark respiration of pines. *Ecological Bulletins* **43**: 50–63.
- Ryan MG, Gower ST, Hubbard RM, Waring RH, Gholz HL, Cropper WP Jr., Running SW. 1995.** Woody tissue maintenance respiration of four conifers in contrasting climates. *Oecologia* **101**: 133–140.
- Sasakawa H, LaRue TA. 1986.** Root respiration associated with nitrate assimilation by cowpea. *Plant Physiology* **81**: 972–975.
- Sawada S. 1970.** An ecophysiological analysis of the difference between the growth rates of young wheat seedlings grown in various seasons. *Journal of the Faculty of Science, University of Tokyo, Section III Botany* **10**: 233–263.



- Šetlik I, ed. 1970. *Prediction and measurement of photosynthetic productivity*. Wageningen, The Netherlands: Centre for Agricultural Publishing and Documentation.
- Sprugel DG. 1990. Components of woody-tissue respiration in young *Abies amabilis* (Dougl.) Forbes trees. *Trees* 4: 88–98.
- Stahl RS, McCree KJ. 1988. Ontogenetic changes in the respiration coefficients of grain sorghum. *Crop Science* 28: 111–113.
- Steer MW. 1988. Plasma membrane turnover in plant cells. *Journal of Experimental Botany* 39: 987–996.
- Stockfors J, Linder S. 1998. Effect of nitrogen on the seasonal course of growth and maintenance respiration in stems of Norway spruce trees. *Tree Physiology* 18: 155–166.
- Stouthamer AH. 1973. A theoretical study on the amount of ATP required for synthesis of microbial cell material. *Antonie van Leeuwenhoek* 39: 545–565.
- Stryer L. 1995. *Biochemistry*. 4th edn. New York: W.H. Freeman and Company.
- Tanaka A, Yamaguchi J. 1968. The growth efficiency in relation to the growth of the rice plant. *Soil Science and Plant Nutrition* 14: 110–116.
- Teal JM. 1962. Energy flow in the salt marsh ecosystem of Georgia. *Ecology* 43: 614–624.
- Thomas MD, Hill GR. 1949. Photosynthesis under field conditions. In: Franck J, Loomis WE, eds. *Photosynthesis in plants*. Ames, IA: Iowa State College Press, 19–52.
- Thornley JHM. 1970. Respiration, growth and maintenance in plants. *Nature* 227: 304–305.
- Thornley JHM. 1971. Energy, respiration, and growth in plants. *Annals of Botany* 35: 721–728.
- Thornley JHM. 1977. Growth, maintenance and respiration: a re-interpretation. *Annals of Botany* 41: 1191–1203.
- Thornley JHM, Cannell MGR. 2000. Modelling the components of plant respiration: representation and realism. *Annals of Botany* 85: 55–67.
- Thornley JHM, Johnson IR. 1990. *Plant and crop modeling*. Oxford: Oxford University Press.
- Tjoelker MG, Reich PB, Oleksyn J. 1999a. Changes in leaf nitrogen and carbohydrates underlie temperature and CO<sub>2</sub> acclimation of dark respiration in five boreal tree species. *Plant, Cell and Environment* 22: 767–778.
- Tjoelker MG, Oleksyn J, Reich PB. 1999b. Acclimation of respiration to temperature and CO<sub>2</sub> in seedlings of boreal tree species in relation to plant size and relative growth rate. *Global Change Biology* 5: 679–691.
- Tooming H. 1970. Mathematical description of net photosynthesis and adaptation processes in the photosynthetic apparatus of plant communities. In: Šetlik I, ed. *Prediction and measurement of photosynthetic productivity*. Wageningen, The Netherlands: Centre for Agricultural Publishing and Documentation, 103–113.
- Vertregt N, Penning de Vries FWT. 1987. A rapid method for determining the efficiency of biosynthesis of plant biomass. *Journal of Theoretical Biology* 128: 109–119.
- Vierstra RD. 1993. Protein degradation in plants. *Annual Review of Plant Physiology and Plant Molecular Biology* 44: 385–410.
- Walton EF, de Jong TM. 1990. Estimating the bioenergetic cost of a developing kiwifruit berry and its growth and maintenance respiration components. *Annals of Botany* 66: 417–424.
- Walton EF, de Jong TM, Loomis RS. 1990. Comparison of four methods calculating the seasonal pattern of plant growth efficiency of a kiwifruit berry. *Annals of Botany* 66: 299–307.
- Walton EF, Wünsche JN, Palmer JW. 1999. Estimation of the bioenergetic costs of fruit and other organ synthesis in apple. *Physiologia Plantarum* 106: 129–134.
- Warren Wilson J. 1967. Ecological data on dry-matter production by plants and plant communities. In: Bradley EF, Denmead OT, eds. *The collection and processing of field data*. New York: John Wiley & Sons, 77–123.
- Whittaker RH, Woodwell GM. 1969. Structure, production and diversity of the oak–pine forest at Brookhaven, New York. *Journal of Ecology* 57: 155–174.
- Williams K, Percival F, Merino J, Mooney HA. 1987. Estimation of tissue construction cost from heat of combustion and organic nitrogen content. *Plant, Cell and Environment* 10: 725–734.
- Wilson D. 1975. Variation in leaf respiration in relation to growth and photosynthesis of *Lolium*. *Annals of Applied Biology* 80: 323–338.
- Wohl K, James WO. 1942. The energy changes associated with plant respiration. *New Phytologist* 41: 230–256.
- Woodwell GM, Houghton RA, Hall CAS, Whitney DE, Moll RA, Juers DW. 1979. The Flax pond ecosystem study: the annual metabolism and nutrient budgets of a salt marsh. In: Jefferies RL, Davy AJ, eds. *Ecological processes in coastal environments*. Oxford: Blackwell, 491–511.
- Yemm EW. 1965. The respiration of plants and their organs. In: Steward FC, ed. *Plant physiology: a treatise, Volume IVA, Metabolism: organic nutrition and nitrogen metabolism*. New York and London: Academic Press, 231–310.
- Zerihun A, McKenzie BA, Morton JD. 1998. Photosynthate costs associated with the utilization of different nitrogen-forms: influence on the carbon balance of plants and shoot-root biomass partitioning. *New Phytologist* 138: 1–11.

## APPENDIX 1

Defining, and measuring, higher-plant respiration is difficult. Biochemically, respiration can be defined as the sum of glycolysis, the oxidative pentose phosphate pathway (or network), the tricarboxylic acid (TCA) or Krebs cycle, mitochondrial e<sup>-</sup> transport, oxidative phosphorylation, and intimately related reactions. A physiological definition of respiration is non-photorespiratory CO<sub>2</sub> release (photorespiration being associated with photosynthesis), though photorespiration can contribute directly to mitochondrial e<sup>-</sup> transport. Unfortunately, the biochemical and physiological definitions may be somewhat incongruous. The biochemical pathways of respiration need not account for all non-photorespiratory CO<sub>2</sub> release in plants because CO<sub>2</sub> is also released in biosynthetic reactions outside the respiratory pathways (e.g. in synthesis of tyrosine and phenylalanine from arogenate). In addition, anaplerotic dark CO<sub>2</sub> fixation by PEP carboxylase can mask some respiratory CO<sub>2</sub> release. It is also unfortunate that neither whole-plant nor plant-community CO<sub>2</sub> release can be directly measured during the course of a 24 h day, a season, or a year. This is because of simultaneous daytime respiration and photosynthesis, continuous CO<sub>2</sub> release by heterotrophic organisms (especially those oxidizing litter and soil organic matter), and, in many cases, inability to unobtrusively enclose whole plants in measuring cuvettes. Nonetheless, available estimates of respiration, and especially the ratio respiration/photosynthesis, made for plants in nature (Table A1) are useful in assessing the quantitative significance of respiration to plant C balance. But it must be kept in mind that such estimates are just that: estimates. Presentation of even two digits in Table A1 may imply greater precision than actually exists. For example, *Fagus sylvatica* L. root respiration was not measured by Möller *et al.* (1954), but simply set to 20% of stem plus branch respiration estimates. In any case, as summarized in Table A1, respiration is a large component of a plant's seasonal or annual C balance, ranging from less than 50% of photosynthesis in many crops to 65–75% in some tropical and boreal trees and coastal marshes.

TABLE A1. Estimates of annual (or seasonal) respiration as a fraction of annual (or seasonal) photosynthesis in intact ecosystems

| Ecosystem                              | Respiration/Photosynthesis | Reference                                                              |
|----------------------------------------|----------------------------|------------------------------------------------------------------------|
| Crop                                   |                            |                                                                        |
| Alfalfa                                | 0.35–0.49                  | Thomas and Hill (1949)                                                 |
| Maize, rice, and wheat                 | c. 0.3–0.6                 | Amthor (1989, Table 6.1)                                               |
| Grassland                              |                            |                                                                        |
| Shortgrass prairie                     | 0.34<br>0.51               | Andrews <i>et al.</i> (1974)<br>Detling (1979)                         |
| Tallgrass prairie                      | 0.61–0.65                  | Risser <i>et al.</i> (1981), range for three treatments                |
| Forest                                 |                            |                                                                        |
| Tropical moist                         |                            |                                                                        |
| Ivory Coast                            | 0.75                       | Müller and Nielsen (1965)                                              |
| Puerto Rico                            | 0.88                       | Derived from Table 24 in Odum (1970)                                   |
| Southern Thailand                      | 0.66                       | Kira (1975)                                                            |
| Temperate                              |                            |                                                                        |
| Warm evergreen                         | 0.72                       | Kira (1975)                                                            |
| Warm evergreen 'oak'                   | 0.66                       | Kira and Yabuki (1978)                                                 |
| <i>Abies sachalinensis</i>             | 0.53                       | Kira (1975)                                                            |
| <i>Castanopsis cuspidata</i>           | 0.575                      | Kira (1975)                                                            |
| <i>Chamaecyparis obtusa</i> plantation | 0.62                       | Hagihara and Hozumi (1991)                                             |
| <i>Cryptomeria japonica</i> plantation | 0.71                       | Kira (1975), mean of five estimates                                    |
| <i>Fagus crenata</i>                   | 0.44, 0.56                 | Kira (1975), secondary forest and plantation                           |
| <i>F. sylvatica</i>                    | 0.39–0.47                  | Möller <i>et al.</i> (1954), range for four ages                       |
| <i>Fraxinus excelsior</i> plantation   | 0.37                       | Kira (1975)                                                            |
| <i>Liriodendron tulipifera</i>         | 0.66                       | Harris <i>et al.</i> (1975)                                            |
| <i>Picea abies</i> plantation          | 0.32                       | Kira (1975)                                                            |
| <i>Pinus densiflora</i> plantation     | 0.71                       | Kira (1975)                                                            |
| <i>P. ponderosa</i>                    | 0.55                       | Law <i>et al.</i> (1999)                                               |
| <i>P. taeda</i> plantation             | 0.58                       | Kinerson (1975)                                                        |
| <i>P. spp.</i>                         | 0.39–0.71*                 | Ryan <i>et al.</i> (1994)                                              |
| <i>Quercus-Acer</i> (southern)         | 0.44–0.55                  | P. J. Hanson (pers. comm. 2000), 7 years                               |
| <i>Quercus-Acer</i> (northern)         | 0.54                       | M. L. Goulden (pers. comm. 1997)                                       |
| <i>Q.-Pinus</i>                        | 0.55                       | Whittaker and Woodwell (1969)                                          |
| <i>Q. spp.</i>                         | 0.61                       | Satchell (1973) (in Edwards <i>et al.</i> , 1981)                      |
| <i>Q.-Carpinus</i>                     | 0.38                       | Medwecka-Kornas <i>et al.</i> (1974) (in Edwards <i>et al.</i> , 1981) |
| Subalpine                              |                            |                                                                        |
| Coniferous                             | 0.72                       | Kitazawa (1977) (in Edwards <i>et al.</i> , 1981)                      |
| <i>Abies</i>                           | 0.675                      | Kira (1975)                                                            |
| <i>A. veitchii</i>                     | 0.61                       | Kira (1975), mean of three estimates                                   |
| Boreal                                 |                            |                                                                        |
| <i>Picea mariana</i>                   | 0.72–0.77                  | Ryan <i>et al.</i> (1997)                                              |
| <i>Pinus banksiana</i>                 | 0.69–0.74                  | Ryan <i>et al.</i> (1997)                                              |
| <i>Populus tremuloides</i>             | 0.64–0.67                  | Ryan <i>et al.</i> (1997)                                              |
| Coastal salt marsh, temperate          |                            |                                                                        |
| <i>Spartina</i>                        | 0.77                       | Teal (1962)                                                            |
| <i>Spartina-Distichlis</i>             | 0.69                       | Woodwell <i>et al.</i> (1979)                                          |
| Tundra, arctic                         | 0.50                       | Reichle (1975)                                                         |

Both respiration and photosynthesis have the same units (e.g. mol C m<sup>-2</sup> ground year<sup>-1</sup>) and photosynthesis is the balance of photosynthetic carboxylations with photorespiratory decarboxylations. To my knowledge, these estimates of respiration and photosynthesis assume that leaf respiration occurs at about the same rate in the light as in the dark, even though photosynthesis probably slows leaf respiration.

\* Range of values for seven young (16–40-year-old) *Pinus* stands. Ryan *et al.* (1994) gave daily (24 h) stem, branch, and root respiration, but only night-time foliage respiration. To obtain total respiration here, night-time foliage respiration was doubled. To then obtain photosynthesis, night-time foliage respiration was added to daytime canopy net CO<sub>2</sub> assimilation. Both transformations assumed that daytime foliage respiration was similar to night-time foliage respiration in spite of differences in temperature and possible effects of photosynthesis on foliage respiration.

## APPENDIX 2

The amount of ATP that can be produced per unit of respiratory substrate (e.g. hexose) oxidized is central to the efficiency of respiration. It is therefore desirable to mechanistically describe that ratio. With glucose as substrate, and assuming its complete oxidation by classical glycolysis and the TCA cycle along with oxidation of the resulting NADH by the respiratory chain, the amount of ADP phosphory-

lated (i.e. ATP formed) per glucose oxidized ( $Y_{\text{ATP,glucose}}$ , mol ATP (mol glucose)<sup>-1</sup>) is (after Amthor, 1994a; and see Stryer, 1995, pp. 551–552):

$$Y_{\text{ATP,glucose}} = 4 + [(1 - a)(b \ 8 \ \text{H}_I^+ + c \ 12 \ \text{H}_{\text{III,IV}}^+) - 4] / (1 + \text{H}_{\text{ATP}}^+) \quad (\text{A1})$$

where the left-most 4 is net substrate-level ADP phosphorylation per glucose,  $a$  is the fraction of protons pumped into the mitochondrial intermembrane space by the respiratory chain that re-enters the mitochondrial matrix through membrane ‘leaks’,  $b$  is the fraction of  $e^-$  from matrix NADH that pass through Complex I ( $1 - b$  of  $e^-$  bypass Complex I via the rotenone-insensitive matrix-facing NADH dehydrogenase, which does not pump protons), 8 is the number of NADH formed (from  $\text{NAD}^+$ ) per glucose by the TCA cycle,  $H_1^+$  is the number of protons pumped into the intermembrane space when an  $e^-$ -pair passes through Complex I,  $c$  is the fraction of  $e^-$  passed from ubiquinol to  $\text{O}_2$  via Complexes III and IV ( $1 - c$  of  $e^-$  are passed to  $\text{O}_2$  via the alternative oxidase, which does not pump protons), 12 is cytosolic and mitochondrial NADH plus  $\text{FADH}_2$  formed (from  $\text{NAD}^+$  and  $\text{FAD}$ ) per glucose,  $H_{\text{III,IV}}^+$  is the number of protons pumped into the intermembrane space when an  $e^-$ -pair passes through both Complexes III and IV, the right-most 4 is protons expended during symport into the mitochondrial matrix of two pyruvate plus the two  $\text{P}_i$  required for TCA-cycle *substrate-level* ADP phosphorylations, 1 in the denominator is the  $\text{H}^+$  entering the matrix via  $\text{H}^+ - \text{P}_i$  symporters with each  $\text{P}_i$  used in *oxidative* ADP phosphorylations, and  $H_{\text{ATP}}^+$  is the number of  $\text{H}^+$  moving through ATP synthase per ADP phosphorylated. [Stryer (1995) noted pyruvate- $\text{H}^+$  symport into the matrix, but neglected it calculating  $Y_{\text{ATP,glucose}}$ .] Similar equations apply to other substrates and/or other respiratory pathways. For example, minor deviations possible in the pathway of glycolysis (see Plaxton, 1996) can be accounted for with simple modifications to eqn (A1). For glucose, the number of ATP produced per  $\text{CO}_2$  released ( $Y_{\text{ATP,C}}$ , mol ATP (mol  $\text{CO}_2$ ) $^{-1}$ )

is simply:  $Y_{\text{ATP,C}} = Y_{\text{ATP,glucose}}/6$ . Equation (A1) does not mean respiration normally yields only ATP (and heat and  $\text{CO}_2$ ); it merely quantifies how much ATP *could* be produced during complete respiratory oxidation of glucose.

When  $a = 0$  (no  $\text{H}^+$  leaks),  $b = 1$  (no rotenone-insensitive dehydrogenase activity),  $c = 1$  (no alternative oxidase activity),  $H_1^+ = 4$  (Nicholls and Ferguson, 1992),  $H_{\text{III,IV}}^+ = 6$  (Nicholls and Ferguson, 1992; Stryer, 1995), and  $H_{\text{ATP}}^+ = 3$  (Nicholls and Ferguson, 1992; Stryer, 1995), then  $Y_{\text{ATP,glucose}} = 29$  mol ATP (mol glucose) $^{-1}$ . (Most older textbooks give  $Y_{\text{ATP,glucose}} = 36$  or 38.) With  $c = 0$  (i.e. all  $e^-$  reducing  $\text{O}_2$  via the alternative oxidase rather than cytochrome  $c$  oxidase) and other parameters as above,  $Y_{\text{ATP,glucose}} = 11$ , a 62% decline from the 29 obtained with  $c = 1$ . There is no requirement for  $Y_{\text{ATP,glucose}}$  (or  $a$ ,  $b$ , or  $c$ ) to take integer values.

ATP production from mitochondrial oxidation of *cytosolic* NAD(P)H [ $Y_{\text{ATP,cyt-NAD(P)H}}$ , mol ATP (mol cytosolic NAD(P)H oxidized) $^{-1}$ ] is:

$$Y_{\text{ATP,cyt-NAD(P)H}} = (1 - a)(c H_{\text{III,IV}}^+)/ (1 + H_{\text{ATP}}^+) \quad (\text{A2})$$

With parameters as above, *maximum*  $Y_{\text{ATP,cyt-NAD(P)H}}$  is 1.5 mol ATP (mol NAD(P)H) $^{-1}$ .

The  $Y_{\text{ATP,glucose}}$ ,  $Y_{\text{ATP,C}}$ , and  $Y_{\text{ATP,cyt-NAD(P)H}}$  defined above all differ from ‘ $Y_{\text{ATP}}$ ’ used in microbiology. Microbiologists Bauchop and Elsdon (1960) defined  $Y_{\text{ATP}}$  (usually written  $Y_{\text{ATP}}$  since then) as ‘dry weight of organism produced/mole ATP formed’ in catabolism. That  $Y_{\text{ATP}}$  is estimated from measurements of growth and substrate consumption in conjunction with calculations (not measurements) of ATP produced per unit substrate consumed [e.g. with a form of equation (A1)].
